# Supplementary material for: Proteomic View of the Crosstalk between Lactobacillus mucosae and Intestinal Epithelial Cells in Co-culture Revealed by Q Exactive-Based Quantitative Proteomics
Source: Front Microbiol. 2017 Dec 12;8:2459. doi: 10.3389/fmicb.2017.02459 (PMC5732961; doi:10.3389/fmicb.2017.02459)
Supplement: Supplementary file 3 [file Table_2.XLSX]

## Sheet: Sheet1
Table S2. Differentially expressed proteins (DEP) in IPEC-J2 cell line after co-culture with L. mucosae LM1
Accession number	UniProt Protein Name	Protein Symbol	Control_1 (C1)	Control_2 (C2)	Control_3 (C3)	Control_4 (C4)	Treatment_1 (T1)	Treatment_2 (T2)	Treatment_3 (T3)	Treatment_4 (T4)	log2 Fold Change*	Fold Change	Up/Down-Regulation
XP_001928349.1	V-type proton ATPase subunit D	ATP6V1D	20654000	17306000	16461000	15282000	0	0	0	0	-Inf	0	Down ↓
XP_003357726.1	cysteine and glycine-rich protein 1-like isoform 3	CSRP1	67366000	70206000	69845000	65540000	0	0	0	0	-Inf	0	Down ↓
XP_003131850.3	bleomycin hydrolase	BLMH	29121000	39447000	44791000	38941000	0	0	0	0	-Inf	0	Down ↓
XP_005656802.1	torsin-1A-interacting protein 1-like, partial	TOR1AIP1	14154000	15215000	14930000	14584000	0	0	0	0	-Inf	0	Down ↓
XP_005668255.1	ADP-sugar pyrophosphatase/ 8-oxo-dGDP phosphatase/nudix (nucleoside diphosphate linked moiety X)-type motif 5	NUDT5	35222000	34774000	29409000	34088000	0	0	0	0	-Inf	0	Down ↓
XP_005668469.1	calcium-binding protein 39-like isoform X2	CAB39L	13028000	9446900	11782000	10540000	0	0	0	0	-Inf	0	Down ↓
XP_005659100.1	NEDD8-activating enzyme E1 regulatory subunit-like	NAE1	14505000	13147000	12352000	16011000	0	0	0	0	-Inf	0	Down ↓
XP_003360438.1	NHP2-like protein 1-like	NHP2L1	0	0	0	0	87629000	75679000	69151000	72894000	Inf	Inf	Up ↑
NP_001231753.1	ribosome biogenesis protein BRX1 homolog	BRIX1	0	0	0	0	65967000	48668000	60880000	54169000	Inf	Inf	Up ↑
XP_003480558.1	peptidyl-prolyl cis-trans isomerase A-like	PPIA	0	0	0	0	36277000	43354000	37961000	41162000	Inf	Inf	Up ↑
NP_001245315.1	DNA topoisomerase 2-beta	TOP2B	0	0	0	0	17699000	22485000	14709000	19711000	Inf	Inf	Up ↑
XP_005663846.1	histone H1.0	H1F0	0	0	0	0	46063000	46756000	43828000	35761000	Inf	Inf	Up ↑
XP_005665199.1	regulator of chromosome condensation isoform X4	RCC1	0	0	0	0	25048000	23823000	28274000	22531000	Inf	Inf	Up ↑
XP_013836040.1	LIM domain only protein 7-like	LMO7	0	0	0	0	13973000	17320000	14826000	15057000	Inf	Inf	Up ↑
XP_005665717.1	histone H2A type 1-F like	HISTH2AF	649670000	683100000	711060000	656560000	24046000000	24144000000	23297000000	21822000000	5.11078	34.5539	Up ↑
XP_005665716.1	histone H2B type 1-H-like	HIST1H2BA	201900000	198510000	221580000	328270000	8379100000	8606200000	7798900000	7861300000	5.10242	34.3543	Up ↑
XP_005665721.1	histone H1.5	LOC574051	0	86872000	0	0	701810000	515200000	480580000	518500000	4.67298	25.5098	Up ↑
NP_001116594.1	Histone H2A	H2A.Z; H2AFZ; H2A.Z-1	0	14190000	15006000	14239000	322090000	151030000	149970000	139750000	4.13445	17.5628	Up ↑
XP_001926797.1	synaptic vesicle glycoprotein 2A	SV2A	0	0	0	25228000	89026000	105950000	94920000	90879000	3.91584	15.0933	Up ↑
NP_001231492.1	Core histone macro-H2A	H2AFY	37494000	87641000	0	0	247210000	294080000	252830000	179910000	2.96048	7.78383	Up ↑
XP_005653413.1	nucleolar complex protein 2 homolog	NOC2L	0	13986000	0	0	23052000	22023000	23722000	24445000	2.737	6.66681	Up ↑
XP_005668907.1	DNA topoisomerase 2-alpha isoform X1	TOP2A	0	75908000	0	60693000	183790000	179650000	204030000	188620000	2.46859	5.53503	Up ↑
XP_003124493.1	vitamin K epoxide reductase complex subunit 1-like protein 1	VKORC1L1	0	18804000	0	0	23797000	24958000	29943000	22185000	2.42357	5.36498	Up ↑
XP_003355641.2	lysophospholipid acyltransferase	LPCAT3	0	0	42300000	0	50409000	56190000	57081000	55600000	2.37404	5.18392	Up ↑
NP_001026962.1	histone H1.3-like protein	LOC595122/HIST1H1D	137170000	0	193370000	241720000	562920000	603580000	1115400000	656650000	2.36036	5.13499	Up ↑
NP_001231160.1	pinin	PNN	0	0	12641000	0	18164000	14334000	15100000	17210000	2.35806	5.12681	Up ↑
XP_003126304.1	SAP domain-containing ribonucleoprotein	SARNP	0	0	0	10411000	13988000	12346000	13112000	13302000	2.34101	5.06656	Up ↑
XP_005668619.1	paraspeckle component 1 isoform X4	PSPC1	28628000	0	28060000	0	67923000	85583000	69772000	52973000	2.28486	4.87318	Up ↑
XP_005674416.2	transmembrane 9 superfamily member 2-like, partial	TM9SF2	49677000	0	0	0	56280000	69411000	56799000	50382000	2.22889	4.68772	Up ↑
XP_005660730.1	barrier-to-autointegration factor	BANF1	150470000	162130000	119930000	150380000	606960000	686340000	777260000	650460000	2.2228	4.66799	Up ↑
XP_005660150.1	PC4 and SFRS1-interacting protein isoform X1	PSIP1	0	13950000	0	18420000	36722000	38783000	41598000	30639000	2.19035	4.56416	Up ↑
NP_001026955.1	ADP-ribosylation factor-like protein 3	ARL3	0	15340000	0	0	18098000	17269000	16472000	16768000	2.16106	4.47243	Up ↑
XP_005671636.1	methylated-DNA--protein-cysteine methyltransferase isoform X3	MGMT	31724000	0	0	35392000	56142000	82493000	69648000	75319000	2.07914	4.22555	Up ↑
XP_005663331.1	prelamin-A/C isoform X3	LMNA	1098700000	1067100000	1149400000	1046400000	4262500000	4475000000	4555400000	4353200000	2.01642	4.04579	Up ↑
XP_005661663.1	lamin-B1 isoform X2	LMNB1	116310000	134550000	142840000	137840000	466020000	549380000	540070000	520950000	1.96585	3.90642	Up ↑
NP_001172084.1	high mobility group protein HMG-I/HMG-Y isoform 2	HMG-I(Y); HMGA1	164110000	145040000	187560000	150240000	523230000	622480000	524710000	555360000	1.78258	3.44042	Up ↑
XP_005660193.1	pumilio domain-containing protein KIAA0020 homolog isoform X3	PUM3	7732800	0	0	8200900	12422000	13401000	14596000	13223000	1.75128	3.36658	Up ↑
XP_003130726.1	nucleola protein 6	NOL6	6893300	0	7691900	0	11372000	11427000	11872000	10576000	1.63332	3.10225	Up ↑
XP_003355798.1	chymotrypsinogen 2-like	LOC562139	160800000	178070000	163930000	168250000	489590000	511350000	486280000	514250000	1.57657	2.98259	Up ↑
XP_003134489.3	DNA topoisomerase 1	TOP1	97891000	73184000	0	64262000	149380000	182360000	181650000	155100000	1.50618	2.84056	Up ↑
XP_005673940.1	THO comlpex subunit 2 isoform X5	THOC2	4187900	0	3690200	3307900	6454200	6376200	9805500	6402800	1.37628	2.59599	Up ↑
XP_005671509.1	structural maintenance of chromosomes protein 3	SMC3	20511000	28516000	24891000	0	39210000	42297000	49052000	44703000	1.24552	2.37103	Up ↑
NP_001038077.1	Tubulin beta chain	TUBB; TUBB2A	1101700000	1422000000	914790000	918050000	2667500000	2295900000	2756600000	2524500000	1.23359	2.35152	Up ↑
XP_005659826.1	actin, alpha cardiac muscle 1 isoform X1	-	3040900000	2691300000	2772400000	3437900000	5608500000	7087400000	6707200000	7052500000	1.14747	2.21525	Up ↑
XP_003124360.1	protein BUD31 homolog	BUD31	11872000	0	11667000	10587000	20798000	15761000	20262000	16230000	1.09803	2.14063	Up ↑
NP_001182263.1	ELAV-like protein	ELAVL1	34407000	35614000	35496000	38647000	54446000	74029000	89884000	86927000	1.08245	2.11763	Up ↑
XP_005669190.1	myb-binding protein 1A	MYBBP1A	325320000	312020000	301290000	325300000	646900000	654680000	711780000	627340000	1.063	2.08928	Up ↑
XP_003361890.2	non-POU domain-containing octamer-binding protein	NONO	222050000	218390000	225140000	220000000	394530000	489940000	502090000	451580000	1.05355	2.07563	Up ↑
XP_003483763.1	nucleolar protein 58	NOP58	122320000	112990000	112750000	127360000	217780000	234700000	219600000	206110000	0.885331	1.84719	Up ↑
XP_003361646.2	nucleolar protein 56-like	NOP56	68935000	69941000	67121000	72999000	122720000	132660000	127530000	129860000	0.878067	1.83791	Up ↑
XP_005657444.1	nucleolar RNA helicase 2	DDX21	670930000	663250000	638780000	615580000	1108500000	1274900000	1150700000	1190300000	0.867993	1.82512	Up ↑
XP_001927639.3	ATP -dependent RNA helicase DDX18 isoform X1	-	53517000	58458000	68547000	73726000	106620000	122090000	102420000	124880000	0.842829	1.79356	Up ↑
XP_005658121.1	heterogeneous nuclear ribonucleoprotein R	HNRNPR	91731000	98873000	133760000	96947000	188120000	186960000	195900000	172790000	0.819971	1.76537	Up ↑
XP_005658769.1	ubiquitin-associated protein 2-like	UBAP2L	18600000	12218000	12120000	12294000	24550000	25460000	22773000	24658000	0.819025	1.76421	Up ↑
XP_003355972.2	rRNA 2'-O-methltransferase fibrillarin	FBL	131450000	145150000	154620000	147700000	247110000	248060000	266090000	246290000	0.799416	1.7404	Up ↑
XP_001927085.1	protein NOV homolog	NOV	195040000	203470000	226690000	210570000	322650000	380030000	386190000	326180000	0.759675	1.69311	Up ↑
XP_005665664.1	protein DEK	DEK	58477000	48025000	49085000	47206000	79510000	85775000	88672000	82990000	0.732514	1.66153	Up ↑
XP_003353914.1	182 kDa tankyrase-1-binding protein isoform X1	TNKS1BP1	19386000	18881000	16419000	18789000	27812000	32766000	33142000	28195000	0.73055	1.65927	Up ↑
XP_005672925.1	RNA-binding protein Raly isoform X4	RALY	91477000	93739000	86327000	88935000	144150000	154600000	155800000	143440000	0.73021	1.65888	Up ↑
XP_005662051.1	general transcription factor II-I isoform X6	GTF2I	25447000	28566000	37944000	36215000	52022000	50233000	57940000	48051000	0.700208	1.62474	Up ↑
XP_005662397.1	U5 small nuclear ribonucleoprotein 200 kDa helicase	SNRNP200	54116000	63066000	59164000	57670000	95998000	84932000	106410000	92380000	0.698329	1.62262	Up ↑
XP_005662399.1	U5 small nuclear ribonucleoprotein 200 kDa helicase-like	-	39619000	41136000	46513000	44138000	83150000	68852000	67877000	58114000	0.697631	1.62184	Up ↑
XP_003482792.2	nucleoprotein TPR isoform X2	TPR	36589000	32798000	39913000	37206000	58828000	64331000	62038000	51960000	0.694883	1.61875	Up ↑
XP_003484071.1	calumenin isoform X1	CALU	107940000	113820000	111110000	104420000	173530000	190680000	162030000	178710000	0.688931	1.61209	Up ↑
XP_005654811.1	heterogeneous nuclear ribonucleoprotein M isoform X2	HNRNPM	265690000	288220000	264570000	252630000	421540000	420340000	449730000	419650000	0.675952	1.59765	Up ↑
XP_005672101.1	splicing factor 3B subunit 1 isoform X2	SF3B1	124070000	132860000	149710000	115830000	212660000	208930000	207000000	198600000	0.662871	1.58323	Up ↑
NP_001230525.1	KH domain containing, RNA binding, signal transduction associated 1	KHDRBS1	32060000	35194000	43665000	33402000	51096000	69273000	62852000	44604000	0.658645	1.5786	Up ↑
XP_005653428.1	leucine zipper protein 1	LUZP1	51330000	52748000	56118000	47022000	82226000	86589000	69111000	81707000	0.625267	1.5425	Up ↑
XP_005665428.1	far upstream element-binding protein 1 isoform X11	FUBP1	78164000	81718000	84132000	83852000	118660000	131990000	124150000	128470000	0.618226	1.53499	Up ↑
XP_003129222.2	SWI.SNF-related matrix-associated actin-dependent regulator of chromatin sbfamily A member 5	SMARCA5; SNF2H	27389000	29931000	30554000	31614000	43645000	49136000	45584000	44972000	0.617632	1.53435	Up ↑
XP_005652746.1	ribosome production factor 2 homolog, partial	-	10100000	9642600	11703000	10711000	17438000	13519000	17774000	15771000	0.613585	1.53006	Up ↑
NP_001161114.1	CDP-diacylglycerol--inositol 3-phosphatidyltransferase	CDIPT	18565000	17871000	17461000	18555000	24869000	28517000	25036000	31031000	0.595214	1.5107	Up ↑
XP_001925225.1	HEAT repeat-containing protein 1	-	30848000	33842000	38563000	38347000	53892000	43804000	62974000	53147000	0.594555	1.51001	Up ↑
XP_005668376.1	high mobility group protein B1 isoform X4	-	516520000	522010000	634750000	517180000	735670000	826230000	855270000	852370000	0.577854	1.49263	Up ↑
XP_001925353.2	histone deacetylase 2	HDAC2	49579000	54886000	56072000	51578000	72110000	88113000	82255000	72983000	0.572615	1.48722	Up ↑
NP_001033720.1	prostaglandin E synthase	PTGES	99679000	77464000	78749000	91473000	107500000	152370000	130440000	124480000	0.567532	1.48199	Up ↑
XP_003131874.3	pre-mRNA-processing-splicing factor 8, partial	-	236970000	249660000	260060000	265120000	366910000	385870000	380540000	356990000	0.558674	1.47291	Up ↑
XP_005660725.1	splicing factor 3B subunit 2 isoform X3	SF3B2	63317000	53391000	60485000	56460000	79742000	97631000	82132000	84530000	0.558188	1.47242	Up ↑
XP_005670932.1	small nuclear ribonucleoprotein Sm D3 isoform X1	SNRPD3	309820000	286580000	313790000	309860000	419250000	450390000	456530000	461440000	0.551092	1.46519	Up ↑
NP_001005156.1	Insulin-like growth factor-binding protein 3	IGFBP-3; IGFBP3	29497000	34321000	32815000	29440000	45678000	46252000	44741000	46928000	0.542299	1.45629	Up ↑
XP_003353868.1	LRRN4 C-terminal-like protein	LRRN4CL	61995000	68602000	70725000	68778000	84360000	108940000	103520000	96422000	0.541924	1.45591	Up ↑
XP_005660827.1	reticulon-3 isoform X3	-	109920000	115880000	126990000	130220000	156180000	171410000	198850000	166880000	0.521468	1.43542	Up ↑
XP_003359613.1	heterogeneous nuclear ribonucleoprotein A3 isoform X3	HNRNPA3	291880000	306670000	307910000	283430000	413130000	459150000	422720000	403260000	0.513229	1.42724	Up ↑
NP_001233167.1	Coatomer subunit gamma	COPG2	89070000	91794000	79240000	82221000	123510000	140660000	121730000	102630000	0.513081	1.42709	Up ↑
XP_005658639.1	cytoplasmic dynein 1 heavy chain 1-like, partial	-	115300000	135250000	127380000	123330000	158450000	182130000	200420000	174130000	0.512646	1.42666	Up ↑
XP_005653850.1	heterogeneous nuclear ribonucleoprotein U	-	476530000	540260000	519610000	572330000	735100000	815130000	795790000	657870000	0.510458	1.4245	Up ↑
XP_005658957.1	heterogeneous nuclear ribonucleoprotein H2	-	47165000	49154000	48909000	48793000	66341000	76497000	69062000	63563000	0.505646	1.41976	Up ↑
NP_001093663.1	Eukaryotic initiation factor 4A-III	eIF4A-III; DDX48; EIF4A3	137000000	131090000	149780000	139890000	182510000	210750000	199770000	195510000	0.499539	1.41376	Up ↑
XP_005674564.1	TAR DNA biding protein	-	49603000	68177000	74267000	75152000	83959000	97812000	93170000	101230000	0.493474	1.40783	Up ↑
XP_005666517.1	cytoplasmic dynein 1 heav chain 1	-	514950000	514330000	521910000	527860000	730070000	747930000	756300000	686530000	0.490454	1.40489	Up ↑
NP_001231584.1	Mesencephalic astrocyte-derived neurotrophic factor	MANF	221880000	249230000	250180000	258050000	351140000	349180000	355840000	314850000	0.485357	1.39993	Up ↑
XP_005661288.1	ATP-dependent RNA helicase DDX39A isoform X5	-	62810000	69071000	70359000	67304000	107980000	86796000	83498000	97370000	0.478845	1.39363	Up ↑
NP_001231176.1	cleavage and polyadenylation specificity factor subunit 5	NUDT21	65249000	65470000	78830000	61427000	89734000	93204000	95734000	97412000	0.47289	1.38789	Up ↑
XP_005658040.1	ATP-dependent RNA helicase A	-	1019300000	1009800000	1039300000	1017700000	1394200000	1462400000	1475500000	1324500000	0.469211	1.38435	Up ↑
XP_003132681.3	protein disulfide-isomerase A5	PDIA5	22727000	30722000	34836000	26712000	41812000	36516000	37870000	42966000	0.468918	1.38407	Up ↑
XP_003353965.2	far upstream element-binding protein 2	-	362230000	357360000	384430000	357360000	495920000	530990000	499980000	486860000	0.462553	1.37798	Up ↑
XP_003353965.2	reticulocalbin-1	RCN1	51611000	47633000	48099000	46643000	62017000	66283000	72646000	66328000	0.462367	1.3778	Up ↑
XP_005666204.1	cytochrome c oxidase subunit 5A, mitochondrial	COX5A	76304000	62097000	77418000	69057000	89672000	87282000	90260000	124270000	0.458619	1.37423	Up ↑
XP_003131380.1	116 kDa U5 small nuclear ribonucleoprotein component	EFTUD2	122000000	115040000	119040000	115600000	168760000	162280000	167980000	147880000	0.455734	1.37148	Up ↑
XP_003131808.2	GPI transamidase component PIG-S-like, partial	-	18868000	15008000	14389000	16765000	22417000	24478000	21732000	20368000	0.452619	1.36852	Up ↑
XP_003126643.3	bcl-2-like protein 13 isoform X1	BCL2L13	89522000	85844000	86842000	89191000	110910000	123840000	119150000	121480000	0.435971	1.35282	Up ↑
NP_001123427.1	60S ribosomal protein L23	RPL23	288170000	277890000	252740000	262350000	321460000	409150000	397200000	331440000	0.43266	1.34972	Up ↑
XP_003354038.1	mitochondrial import inner membrane translocase subunit Tim13	TIMM13	78072000	70176000	68566000	73908000	92519000	107540000	88659000	102390000	0.427927	1.3453	Up ↑
NP_001230623.1	heterogeneous nuclear ribonucleoproteins C1/C2 isoform 2	HNRNPC	350940000	374070000	358890000	368700000	506960000	492420000	483640000	463920000	0.422571	1.34031	Up ↑
XP_001925948.1	3-ketodihydrosphingosine reductase isoform X1	KDSR	31758000	34984000	36285000	30652000	46958000	42008000	43781000	46401000	0.422379	1.34014	Up ↑
XP_005661413.1	AP-3 complex subunit delta-1, partial	-	62972000	57669000	61958000	58890000	84723000	81377000	74234000	82451000	0.418616	1.33664	Up ↑
XP_003132151.1	3-ketoacyl-CoA thiolase, peroxisomal	ACAA1	45750000	46948000	44753000	41233000	57978000	64789000	54658000	61174000	0.417178	1.33531	Up ↑
XP_005664411.1	splicing factor 3B subunit 3	-	53350000	60723000	55588000	60530000	78807000	85464000	77163000	65909000	0.417018	1.33517	Up ↑
XP_003483030.1	eukaryotic translation initiation factor 1	EIF1	109560000	93086000	107040000	96614000	128830000	149300000	130560000	132920000	0.414709	1.33303	Up ↑
XP_005657832.1	septin-7 isoform X4	SEP4	316250000	315350000	306540000	310340000	416720000	415610000	415580000	413410000	0.412157	1.33067	Up ↑
XP_005658977.1	splicing factor 3B subunit 3-like	-	50192000	53317000	57288000	57864000	68733000	84590000	71593000	65943000	0.411624	1.33018	Up ↑
NP_001230549.1	cytoplasmic dynein 1 light intermediate chain 2	DYNC1LI2	21388000	28159000	25749000	29634000	33032000	37346000	39005000	30142000	0.411096	1.3297	Up ↑
XP_003129409.4	heterogeneous nuclear ribonucleoprotein D-like	-	73645000	81588000	84238000	83604000	105080000	109170000	102340000	110910000	0.404055	1.32322	Up ↑
XP_003355797.1	chymotrypsinogen B isoform X2	CTRB2; LOC100621642	233380000	254240000	300690000	220660000	307390000	342820000	353060000	330790000	0.40294	1.3222	Up ↑
XP_005664657.1	heterogeneous nuclear ribonucleoprotein L	-	275890000	247190000	265530000	280410000	334610000	356580000	359640000	357280000	0.397471	1.3172	Up ↑
XP_005664755.1	nucleobindin-1 isoform X2	-	44350000	54385000	43252000	42268000	59497000	57547000	62952000	62696000	0.397423	1.31715	Up ↑
XP_005658471.1	ER lumen protein retaining receptor 2-like, partial	-	36149000	46399000	50283000	52246000	63425000	66212000	57034000	56353000	0.392973	1.3131	Up ↑
XP_003133495.3	Polypeptide N-acetylgalactosaminyltransferase	GALNT3	97950000	89942000	82861000	96128000	121090000	131710000	115280000	112360000	0.389044	1.30953	Up ↑
NP_001123436.1	60S acidic ribosomal protein P1 isoform X1	RPLP1	406320000	332780000	384210000	382740000	528850000	448320000	455150000	538570000	0.388078	1.30865	Up ↑
XP_005658976.1	surfeit locus protein 4-like, partial	-	58750000	54605000	58504000	61699000	74320000	76534000	76078000	78476000	0.386957	1.30763	Up ↑
XP_003126030.1	NADH-cytochrome b5 reductase 3-like	LOC100524254	83707000	83969000	85028000	79085000	95879000	113810000	110430000	113660000	0.386694	1.30739	Up ↑
XP_005660503.1	niban-like protein 1	-	79059000	86142000	79481000	76685000	101520000	114600000	108070000	95671000	0.38569	1.30648	Up ↑
XP_003123691.1	heterogeneous nuclear ribonucleoprotein H isoform X6	HNRNPH1	627240000	612610000	624110000	579010000	796080000	860870000	793850000	739870000	0.385223	1.30606	Up ↑
XP_005664829.1	myosin-14-like	-	80237000	77479000	83037000	73304000	96301000	96290000	109340000	108000000	0.384355	1.30528	Up ↑
NP_001177104.1	enoyl-CoA hydratase, mitochondrial	ECHS1	127640000	130290000	118340000	130780000	169080000	149130000	177060000	165370000	0.381736	1.30291	Up ↑
XP_005667681.1	serum paraoxonase/arylesterase 2-like isoform X2	-	9048000	9784400	11123000	10547000	13260000	13433000	13749000	12251000	0.379604	1.30098	Up ↑
XP_005660264.1	tropomyosin beta chain isoform X2	TPM2	247310000	234860000	230550000	218160000	282420000	309350000	291860000	321770000	0.372845	1.2949	Up ↑
XP_005661470.1	Polypyrimidine tract-binding protein 1	PTBP1; PTB	870900000	936890000	953210000	962430000	1197900000	1217300000	1232900000	1166100000	0.370664	1.29295	Up ↑
NP_001240636.1	ATP-dependent DNA helicase Q1	RECQL	18641000	26488000	27268000	22381000	27713000	30440000	34463000	29615000	0.366986	1.28966	Up ↑
XP_003358503.1	U3 small nucleolar RNA-interacting protein 2	RRP9	37404000	39096000	34344000	29980000	43319000	50339000	49802000	37645000	0.362933	1.28604	Up ↑
NP_001172101.1	ubiquinol-cytochrome c reductase binding protein	UQCRB	100200000	104230000	90657000	86996000	106030000	141160000	115170000	127210000	0.357629	1.28132	Up ↑
XP_005672882.1	transmembrane 9 superfamily member 4	-	58042000	64719000	72882000	62007000	67222000	92793000	90614000	78973000	0.355312	1.27926	Up ↑
NP_001121929.1	pre-mRNA-processing factor 19	nmp-200; PRPF19	305600000	278830000	306780000	294370000	359020000	401390000	393520000	362370000	0.354962	1.27895	Up ↑
XP_005663912.1	heterogeneous nuclear ribonucleoprotein A1 isoform X2	HNRPA1; ROA1; HNRNPA1	2144900000	2141700000	2112000000	2108400000	2811100000	2811700000	2716100000	2537700000	0.354505	1.27855	Up ↑
NP_001230582.1	small nuclear ribonucleoprotein Sm D2	SNRPD2	106470000	115080000	105720000	106690000	131550000	143410000	132820000	146450000	0.352923	1.27715	Up ↑
XP_005664408.1	Golgi apparatus protein 1 isoform X1	GLG1	127310000	149470000	151540000	136060000	179110000	192480000	182620000	166110000	0.351971	1.2763	Up ↑
NP_001116657.1	Ras-related protein Rap-2a	RAP2A; RAP2B	58458000	53928000	62619000	56384000	61113000	76418000	76642000	80937000	0.350933	1.27538	Up ↑
XP_005653912.1	septin-9 isoform X2	SEPT9	224330000	234130000	234560000	227970000	275730000	335750000	297080000	266050000	0.350924	1.27538	Up ↑
XP_005666094.1	exportin-5	XPO5	834620000	886280000	920790000	866140000	1110300000	1154500000	1101800000	1078600000	0.341669	1.26722	Up ↑
XP_003126027.3	protein kinase C and casein kinase substrate in neurons protein 2	PACSIN2	80261000	89274000	82714000	95686000	113760000	105420000	111130000	110120000	0.340095	1.26584	Up ↑
XP_003123290.2	interleukin enhancer-binding factor 3 isoform X1	ILF3	517360000	469570000	566120000	455340000	610000000	653870000	663940000	613230000	0.33938	1.26521	Up ↑
NP_001005730.1	Glucosylceramidase	GBA	36381000	31388000	37178000	32112000	43477000	43734000	44901000	40889000	0.335983	1.26224	Up ↑
XP_005669873.1	nuclear pore membrane glycoprotein 210	NUP210	19569000	21319000	19392000	19557000	26366000	25830000	22589000	25770000	0.332855	1.2595	Up ↑
XP_005663582.1	RNA-binding protein 8A isoform X2	RBM8A	66773000	61482000	64625000	63111000	66231000	89864000	84138000	82108000	0.332495	1.25919	Up ↑
XP_005653221.1	CD9 antigen-like	CD9	75652000	60069000	56327000	53042000	69455000	76156000	81656000	81262000	0.332094	1.25884	Up ↑
XP_003125122.1	RNA-binding protein PNO1	PNO1	15330000	15231000	16863000	14704000	19009000	16923000	21208000	21048000	0.331704	1.2585	Up ↑
NP_001038025.1	Serine/threonine-protein phosphatase	PPP1CC	440390000	429970000	468490000	420080000	529720000	537090000	577540000	563190000	0.327742	1.25505	Up ↑
XP_005667537.1	STT3, subunit of the oligosaccharyltransferase complex, homolog A isoform X2	STT3B	92781000	96332000	102030000	96021000	111200000	134120000	131720000	108840000	0.327655	1.25497	Up ↑
XP_003129789.1	dipeptidyl peptidase 1 isoform X1	CTSC	435850000	427900000	489510000	437820000	562260000	574080000	567960000	538320000	0.324355	1.2521	Up ↑
XP_005672161.1	Ribosome biogenesis protein WDR12	WDR12	54638000	49861000	59972000	57953000	71916000	73541000	66774000	65634000	0.321072	1.24926	Up ↑
NP_001001638.1	60S ribosomal protein L11	RPL11	319790000	291110000	288550000	298180000	344360000	441170000	347370000	362220000	0.320079	1.2484	Up ↑
NP_999528.1	40S ribosomal protein S12	RPS12	838590000	786290000	863360000	802880000	1006700000	1009800000	1022900000	1068600000	0.319858	1.24821	Up ↑
NP_001230429.1	vesicle transport protein GOT1B	GOLT1B	16842000	18338000	16742000	15040000	24743000	20534000	18847000	19422000	0.319228	1.24766	Up ↑
NP_001137170.1	long-chain-fatty-acid--CoA ligase 3	ACSL3	94133000	92108000	102210000	100780000	107530000	141430000	118490000	118110000	0.319023	1.24749	Up ↑
NP_999076.1	Membrane-associated progesterone receptor component 1	PGRMC1	162470000	136100000	145740000	111110000	158310000	181280000	175640000	177360000	0.318422	1.24697	Up ↑
XP_005659416.1	translocation protein SEC63 homolog isoform X3	SEC63	68780000	75104000	66363000	80036000	85631000	80395000	101220000	92593000	0.309891	1.23961	Up ↑
XP_005655647.1	myosin light polypeptide 6 isoform X4	LOC106504064; MYL6	1956200000	1961300000	2009600000	1909900000	2483200000	2485000000	2450200000	2288700000	0.308739	1.23862	Up ↑
XP_003356007.1	EH domain-containing protein 2	EHD2	150370000	154100000	154460000	151640000	186980000	191110000	184440000	192780000	0.306912	1.23706	Up ↑
NP_001167604.1	Calreticulin	CRP55; ERp60; Calregulin; HACBP; CALR	1972300000	1960800000	2172900000	1957000000	2347300000	2579500000	2536300000	2490100000	0.303844	1.23443	Up ↑
XP_003483154.2	myosin-10, partial	MYH10	734230000	714460000	750370000	738310000	891830000	929510000	938330000	864360000	0.30307	1.23377	Up ↑
XP_005661772.1	matrin-3 isoform X9	MATR3	326990000	310330000	327200000	311320000	393890000	392540000	377910000	406270000	0.299878	1.23104	Up ↑
XP_005671982.1	lupus La protein	SSB	471450000	449230000	476170000	469960000	596970000	574960000	589700000	533330000	0.297894	1.22935	Up ↑
NP_001182495.1	serine/arginine-rich splicing factor 9	SRSF9	54978000	61078000	60981000	71789000	70594000	84153000	78936000	72142000	0.297569	1.22907	Up ↑
XP_003128047.2	protein mago nashi homolog	MAGOH	106990000	109210000	109050000	100350000	137520000	126600000	127610000	130200000	0.294358	1.22634	Up ↑
NP_001182048.1	protein disulfide-isomerase A6 precursor	pdi-p5; PDIA6	1021500000	995190000	1040400000	1082600000	1218100000	1268700000	1380100000	1208700000	0.294056	1.22608	Up ↑
NP_001005157.1	Spliceosome RNA helicase DDX39B	BAT1; DDX39B	469080000	460450000	473170000	465070000	574440000	562910000	591970000	553020000	0.289197	1.22196	Up ↑
XP_005657378.1	aldehyde dehydrogenase, mitochondrial isoform X1	ALDH2	77067000	76607000	73264000	75284000	81513000	98040000	100070000	89630000	0.289001	1.22179	Up ↑
NP_001193288.1	Glyceraldehyde-3-phosphate dehydrogenase	GAPDH; GAPD	14378000000	15390000000	15455000000	14942000000	18162000000	18885000000	18277000000	18109000000	0.287504	1.22053	Up ↑
NP_001231283.1	protein transport protein Sec61 subunit alpha isoform 1	SEC61A1	192260000	177580000	187570000	204750000	202610000	257290000	253950000	216070000	0.287013	1.22011	Up ↑
NP_001103414.1	retrotransposon-derived protein PEG10 isoform 2	PEG10	87828000	77370000	95838000	93248000	112400000	107000000	112760000	99303000	0.284331	1.21785	Up ↑
XP_005661041.1	apoptosis inhibitor 5 isoform X2	API5	62117000	65193000	55622000	58999000	64561000	73695000	84652000	71426000	0.282859	1.2166	Up ↑
XP_005663885.1	myosin-9	MYH9	10227000000	10284000000	11008000000	10357000000	12305000000	13045000000	13047000000	12431000000	0.2795	1.21377	Up ↑
XP_003353925.2	mitochondrial carrier homolog 2	MTCH2	175830000	188320000	170260000	180010000	204760000	240840000	212800000	207990000	0.278244	1.21272	Up ↑
XP_005653008.1	voltage-dependent anion-selective channel protein 1 isoform X4	VDAC1	2282000000	2321700000	2244400000	2368700000	2638400000	2888600000	2909900000	2716800000	0.275185	1.21015	Up ↑
NP_999534.1	Voltage-dependent anion-selective channel protein 2	VDAC2	2219600000	2151800000	2314500000	2197500000	2537500000	2738600000	2895500000	2566800000	0.273595	1.20882	Up ↑
XP_005669223.1	mitochondrial 2-oxoglutarate/malate carrier protein	-	68966000	65340000	76673000	70070000	84232000	90073000	83182000	81494000	0.270383	1.20613	Up ↑
XP_005661794.1	uncharacterized protein LOC102167522	LOC102167522	20433000	19178000	18057000	16948000	19525000	24468000	22959000	22872000	0.267616	1.20382	Up ↑
XP_005662398.1	U5 small nuclear ribonucleoprotein 200 kDa helicase-like	-	63493000	58577000	71941000	68826000	75103000	89054000	75110000	77063000	0.267262	1.20352	Up ↑
XP_005668979.1	luc7-like protein 3 isoform X6	LUC7L3	25523000	27193000	24695000	30229000	31484000	37108000	32295000	28589000	0.26647	1.20286	Up ↑
XP_005661508.1	vesicular integral-membrane protein VIP36 isoform X1	GP36B; LMAN2	165560000	177760000	199950000	164540000	196430000	197460000	221980000	235470000	0.266373	1.20278	Up ↑
XP_001928233.1	tubulin alpha-1D chain	TUBA1A; LOC100158003	627870000	732050000	819950000	741230000	946340000	845490000	860230000	856270000	0.264273	1.20103	Up ↑
XP_001925699.2	disintegrin and metalloproteinase domain-containing protein 9	ADAM-9; LOC397344; Adam9	13983000	14580000	17053000	15562000	17717000	19479000	18840000	17383000	0.263141	1.20009	Up ↑
NP_999227.1	Dihydrolipoyl dehydrogenase, mitochondrial	DLDH; DLD	445520000	475910000	521220000	475290000	531610000	597970000	577440000	590060000	0.260244	1.19768	Up ↑
NP_001186292.1	calcium-binding mitochondrial carrier protein SCaMC-1	SCAMC-1; SLC25A24	278520000	308950000	264790000	295120000	348880000	332450000	344770000	346860000	0.258946	1.1966	Up ↑
NP_001231560.1	cytoskeleton-associated protein 4	CKAP4	2290600000	2462300000	2424500000	2348900000	2700500000	2928200000	2958400000	2811200000	0.258831	1.19651	Up ↑
XP_001929445.2	ATP synthase subunit beta, mitochondrial	ATP5B	4870100000	4926600000	5164600000	5079600000	5923100000	6142800000	6072200000	5795900000	0.256114	1.19426	Up ↑
XP_003481767.1	anoctamin-6 isoform X2	ANO6	87004000	91318000	84609000	87736000	103570000	113290000	103790000	97811000	0.254992	1.19333	Up ↑
NP_001177107.1	60S ribosomal protein L30	RPL30	591020000	625210000	664040000	616790000	686840000	820990000	798980000	667870000	0.252504	1.19127	Up ↑
XP_003481845.1	AP-1 complex subunit gamma-1 isoform X2	AP1G1	130650000	133610000	128660000	122590000	146080000	151760000	168250000	147070000	0.250263	1.18942	Up ↑
NP_999583.1	ADP/ATP translocase 3	SLC25A6	354240000	343810000	355830000	336410000	404600000	412020000	447000000	388940000	0.249317	1.18864	Up ↑
XP_003126994.1	V-type proton ATPase subunit d 1	ATP6V0D1	55571000	60921000	55786000	51987000	61446000	71152000	68395000	65418000	0.248449	1.18793	Up ↑
XP_005663466.1	interleukin enhancer-binding factor 2	ILF2	508480000	517070000	513020000	529340000	591550000	646600000	625550000	586370000	0.24465	1.1848	Up ↑
XP_003131834.1	carboxypeptidase D	CPD	151210000	145330000	151160000	151010000	187520000	182740000	169980000	167660000	0.241688	1.18238	Up ↑
NP_001131099.1	ERO1-like protein alpha	ERO1A; ERO1-L; ERO1L	142800000	135510000	160550000	141330000	165780000	168070000	178270000	172880000	0.239579	1.18065	Up ↑
XP_001926332.2	short/branched chain specific acyl-CoA dehydrogenase	ACADSB	16260000	20240000	20104000	19426000	22852000	23283000	23717000	19810000	0.237928	1.1793	Up ↑
XP_005674368.1	ATP synthase-coupling factor 6, mitochondrial	LOC100621056	133380000	128880000	133540000	131970000	146920000	165910000	159250000	148840000	0.234498	1.1765	Up ↑
NP_001090934.1	Small nuclear ribonucleoprotein E	SmE; snRNP-E; Sm-E; SNRPE	115240000	134570000	145470000	128330000	153870000	144550000	159530000	157770000	0.233782	1.17591	Up ↑
NP_001231230.1	importin-5	IPO5	1125900000	1162200000	1159200000	1162800000	1294500000	1425300000	1377600000	1321700000	0.233255	1.17548	Up ↑
XP_005663968.1	retinol dehydrogenase 16	LOC100512656	27213000	30607000	27325000	29488000	33690000	31260000	33573000	36123000	0.232149	1.17458	Up ↑
XP_005657714.1	voltage-dependent anion-selective channel protein 3-like	VDAC3	89929000	89993000	88469000	80423000	105970000	97694000	110830000	95138000	0.23187	1.17436	Up ↑
XP_003357976.1	actin, cytoplasmic 2	ACTG1; ACTB	50560000000	50562000000	49033000000	50169000000	57746000000	59227000000	59394000000	58855000000	0.231688	1.17421	Up ↑
XP_005653679.1	heterogeneous nuclear ribonucleoprotein D0	HNRNPD	91321000	103090000	114990000	98891000	131620000	117380000	123130000	107210000	0.231448	1.17401	Up ↑
XP_003482544.1	60S ribosomal protein L27a-like isoform X2	LOC100739437	251490000	275680000	260900000	255840000	311730000	306990000	300250000	306400000	0.23122	1.17383	Up ↑
XP_005674499.1	thyroid hormone receptor-associated protein 3	THRAP3	101680000	87465000	97788000	100850000	102780000	116090000	123840000	111930000	0.229475	1.17241	Up ↑
XP_003483500.1	Splicing factor 3A subunit 1	SF3A1	119600000	118180000	112260000	109980000	131090000	134540000	140540000	132850000	0.228642	1.17173	Up ↑
NP_001007519.1	Heat shock protein beta-1	HSP27; HSPB1	8714700000	8628900000	7904800000	8502300000	9972000000	10126000000	9782400000	9653400000	0.228169	1.17135	Up ↑
XP_003121938.1	40S ribosomal protein S6 isoform X1	RPS6	434470000	427070000	393530000	448490000	452770000	523660000	521420000	496710000	0.227518	1.17082	Up ↑
XP_005658463.1	beta-galactosidase-like, partial	LACZ	100130000	101420000	96632000	111270000	110060000	125160000	125390000	118060000	0.225337	1.16905	Up ↑
NP_001230722.1	septin-2	SEPT2	228330000	218950000	235960000	227960000	259390000	283800000	268100000	251720000	0.222316	1.1666	Up ↑
XP_005664555.1	cytochrome c oxidase subunit 6B1 isoform X1	COX6B	89279000	87586000	91003000	97123000	96250000	113640000	111440000	104380000	0.22201	1.16636	Up ↑
XP_005652597.1	poly(rC)-binding protein 2 isoform X26	PCBP2	891750000	880520000	950320000	862670000	998820000	1116600000	1032900000	1030000000	0.220845	1.16542	Up ↑
XP_005655606.1	tubulin alpha-1A chain isoform X2	TUBA1A	578030000	554910000	584380000	576600000	727010000	620890000	643490000	681540000	0.220607	1.16522	Up ↑
XP_003480383.1	peptidyl-prolyl cis-trans isomerase B, partial	-	332950000	339620000	351060000	365000000	417090000	418560000	394000000	387920000	0.220166	1.16487	Up ↑
XP_005667565.1	amyloid-like protein 2 isoform X2	APLP2	147600000	158970000	166750000	161650000	186490000	188650000	185630000	177930000	0.2183	1.16336	Up ↑
XP_005661912.1	actin-related protein 2/3 complex subunit 1A isoform X1	ARPC1A	234540000	228300000	245940000	224480000	258710000	278070000	285590000	261490000	0.215827	1.16137	Up ↑
XP_005674165.1	ruvB-like 1-like, partial	RUVBL1	211460000	193970000	200690000	208880000	230840000	243650000	241210000	230050000	0.214659	1.16043	Up ↑
NP_001231613.1	ATP synthase subunit d, mitochondrial	ATP5H	424470000	440000000	480610000	455620000	492400000	563200000	546920000	478480000	0.208719	1.15566	Up ↑
XP_005667967.1	protein transport protein Sec61 subunit gamma isoform X2	SEC61G	35651000	35726000	35118000	37809000	39501000	44884000	41239000	40931000	0.206887	1.1542	Up ↑
XP_001926746.1	transmembrane emp24 domain-containing protein 10	TMED10	385960000	385100000	413240000	387710000	441250000	477400000	437410000	457820000	0.206469	1.15386	Up ↑
XP_005652678.1	condensin complex subunit 1	NCAPD2	14719000	17050000	17013000	16470000	17780000	19156000	19662000	18683000	0.206264	1.1537	Up ↑
NP_999471.1	peroxisomal multifunctional enzyme type 2	HSD17B4	254290000	254910000	252910000	261580000	285330000	291400000	311660000	291640000	0.205045	1.15272	Up ↑
XP_003484383.1	peptidyl-prolyl cis-trans isomerase B	PPIB	263260000	259220000	252300000	259390000	285430000	317070000	287980000	301520000	0.204911	1.15262	Up ↑
NP_001032810.1	cathepsin D precursor	CTSD	551950000	577930000	529870000	554090000	592760000	677770000	670300000	609150000	0.203935	1.15184	Up ↑
NP_001177097.1	protein S100-A14	S100A14	212040000	253570000	244140000	243260000	286800000	273700000	269190000	267970000	0.203868	1.15178	Up ↑
XP_003362258.1	NADH dehydrogenase [ubiquinone] 1 beta subcomplex subunit 10	NDUFB10	74674000	79997000	70390000	82602000	89062000	88672000	88700000	87111000	0.200543	1.14913	Up ↑
XP_003132080.1	fatty aldehyde dehydrogenase isoform X1	ALDH3A2	125790000	134960000	135820000	118460000	142260000	147520000	153670000	148350000	0.200453	1.14906	Up ↑
NP_001231313.1	alpha-soluble NSF attachment protein	NAPA	114080000	108150000	122210000	115330000	120290000	146520000	131280000	129910000	0.199626	1.1484	Up ↑
NP_999189.1	Serine/threonine-protein phosphatase 2A 65 kDa regulatory subunit A alpha isoform	PPP2R1A	617730000	601220000	613870000	652150000	643470000	750520000	764430000	694370000	0.199145	1.14802	Up ↑
XP_005657469.1	sphingosine-1-phosphate lyase 1 isoform X8	-	137070000	141810000	148570000	148690000	158610000	173380000	157350000	171970000	0.198907	1.14783	Up ↑
NP_001138373.1	Proteasome subunit alpha type	PSMA5	669700000	641690000	656010000	656860000	735080000	776080000	765640000	731680000	0.197124	1.14641	Up ↑
NP_001106915.1	F-actin-capping protein subunit beta	CAPZB	605480000	587940000	604290000	588060000	639190000	709720000	728980000	654910000	0.195925	1.14546	Up ↑
XP_005673366.1	heterogeneous nuclear ribonucleoproteins A2/B1 isoform X4	-	1904900000	1956600000	2151400000	1891200000	2220400000	2341400000	2263100000	2227600000	0.195715	1.14529	Up ↑
NP_001090923.1	F-actin capping protein subunit alpha 1	LOC100037957; Capza; CAPZA1	614300000	660110000	636920000	640940000	688640000	759610000	798340000	675660000	0.195299	1.14496	Up ↑
XP_005665592.1	tubulin beta-2B chain isoform X3	-	174580000	175040000	179070000	198950000	187250000	215220000	222990000	206930000	0.194035	1.14396	Up ↑
NP_001231180.1	myosin regulatory light chain 2 protein isoform 2	LOC733637	1304200000	1369600000	1335400000	1333100000	1475500000	1590200000	1615400000	1421600000	0.191987	1.14234	Up ↑
XP_003122400.2	tubulin beta-4B chain	TUBB4B	9775100000	10226000000	10337000000	10013000000	11768000000	11160000000	12009000000	11142000000	0.191501	1.14195	Up ↑
NP_001038009.1	Tubulin alpha-1B chain	TUBA3; TUBA1B	11176000000	11401000000	11730000000	11402000000	12429000000	13217000000	13407000000	13105000000	0.19041	1.14109	Up ↑
XP_005663785.1	heparan sulfate 2-O-sulfotransferase 1 isoform X5	-	24516000	26032000	25704000	25793000	28081000	27786000	30647000	29914000	0.190233	1.14095	Up ↑
NP_999531.1	Serine/threonine-protein phosphatase 2A catalytic subunit alpha isoform	PPP2CA	232370000	239730000	244760000	232840000	258980000	284750000	274140000	264680000	0.18889	1.13989	Up ↑
NP_001106165.1	heterogeneous nuclear ribonucleoprotein A/B	CBF-A	1214700000	1223300000	1214300000	1254100000	1447100000	1376100000	1408900000	1355400000	0.187538	1.13882	Up ↑
XP_005657429.1	AP-1 complex subunit beta-1 isoform X12	-	90866000	83015000	90669000	82729000	95468000	106490000	101440000	92029000	0.187316	1.13864	Up ↑
XP_003357166.3	importin-7	-	238720000	234760000	228790000	221680000	259630000	271100000	267680000	252720000	0.186054	1.13765	Up ↑
NP_001033096.1	Serine/arginine-rich splicing factor 1	SFRS1; SRSF1	246480000	227230000	231630000	243020000	249990000	288160000	270140000	268640000	0.183418	1.13557	Up ↑
XP_003134106.1	nucleophosmin isoformX2	-	1837100000	1905900000	2064800000	1961400000	2117200000	2310800000	2260700000	2132200000	0.18316	1.13537	Up ↑
NP_001090948.1	60S ribosomal protein L27	RPL27	409230000	396670000	469070000	413970000	474630000	472030000	509920000	460980000	0.183154	1.13536	Up ↑
XP_005659997.1	ADP-ribosylation factor 6 isoform X2	-	301330000	303470000	269710000	282620000	347330000	336340000	318600000	309440000	0.180898	1.13359	Up ↑
XP_005657075.1	Platelet-activating factor acetylhydrolase IB subunit alpha	PAFAH1B1	142800000	140780000	151590000	129990000	150600000	161450000	175670000	152170000	0.179165	1.13223	Up ↑
XP_003134012.3	superkiller viralicidic activity 2-like 2	SKIV2L2	73592000	76568000	70889000	82231000	82315000	87231000	79667000	93759000	0.17744	1.13088	Up ↑
XP_001927830.3	78 kDa glucose-regulated protein	-	5825800000	5910900000	6043200000	5856000000	6212200000	7092000000	6859800000	6489200000	0.173329	1.12766	Up ↑
XP_005671761.1	caspase-3	-	90275000	101960000	100450000	96412000	117430000	103110000	113590000	103880000	0.170834	1.12571	Up ↑
XP_005657817.1	transportin-3	-	86132000	79195000	89882000	78085000	94054000	96203000	94777000	89795000	0.169437	1.12462	Up ↑
NP_001230144.1	exportin-2	CSE1L; Exportin-2	1700100000	1681000000	1810300000	1791500000	1925000000	2020900000	1981700000	1925400000	0.169418	1.1246	Up ↑
XP_005671677.1	activated RNA polymerase II transcriptional coactivator p15	SUB1	289340000	280190000	273160000	286770000	329920000	318480000	311350000	308060000	0.166705	1.12249	Up ↑
NP_001026954.1	ADP-ribosylation factor-like protein 1	ARL1	139220000	144800000	147790000	145000000	168130000	160140000	171140000	147990000	0.166561	1.12238	Up ↑
XP_001927122.3	adipocyte plasma membrane-associated protein isoform X1	APMAP	181090000	181000000	205020000	189760000	213670000	201370000	207070000	226990000	0.165889	1.12186	Up ↑
XP_003125950.2	Calponin	CNN3	109300000	108680000	104100000	98820000	113670000	124830000	113220000	120420000	0.165737	1.12174	Up ↑
XP_005664753.1	RuvB-like 2 isoform X3	-	216730000	217600000	217640000	210550000	235170000	258030000	230920000	242670000	0.164645	1.12089	Up ↑
NP_001172096.1	signal sequence receptor, alpha	SSR1	146530000	137690000	136560000	137330000	147850000	164510000	150000000	162680000	0.163399	1.11992	Up ↑
XP_005658960.1	ribonuclease inhibitor, partial	-	687170000	692040000	677620000	673870000	725140000	790430000	784150000	746500000	0.157749	1.11555	Up ↑
XP_003354851.2	exportin-1	-	217740000	223920000	228590000	232630000	263410000	262630000	250870000	230130000	0.157515	1.11536	Up ↑
NP_001157984.1	phosphate carrier protein, mitochondrial	SLC25A3	1175700000	1094500000	1149800000	1122600000	1222800000	1302100000	1218800000	1306600000	0.152851	1.11176	Up ↑
NP_001070695.1	Ubiquitin carboxyl-terminal hydrolase isozyme L3	UCHL3	24439000	23494000	24609000	21276000	26519000	25197000	27303000	25257000	0.15247	1.11147	Up ↑
NP_001131101.1	endoplasmic reticulum resident protein 44 precursor	ERP44; TXNDC4	132920000	128840000	140490000	134960000	155480000	154610000	139080000	146170000	0.148228	1.10821	Up ↑
XP_001926739.2	ras-related protein Rab-2A	RAB2A	453180000	476320000	452270000	473110000	499840000	515660000	517270000	520990000	0.146942	1.10722	Up ↑
XP_005660552.1	spectrin alpha chain, non-erythrocytic 1 isoform X9	-	3550500000	3608800000	3657500000	3585200000	3859500000	4042500000	4148000000	3890300000	0.14641	1.10681	Up ↑
XP_005654459.1	Elongation factor 1-alpha	EEF1A1; ef1alpha; EF1A1	12050000000	12074000000	12188000000	12169000000	12943000000	13628000000	13264000000	13732000000	0.143925	1.10491	Up ↑
XP_003359556.2	UDP-glucose:glycoprotein glucosyltransferase 1	-	401340000	406650000	432120000	415680000	445300000	474480000	455010000	453190000	0.142731	1.10399	Up ↑
NP_001123442.1	Cytochrome c	CYCS; CYC	79735000	86866000	74820000	81250000	89864000	92934000	84563000	88170000	0.139911	1.10184	Up ↑
XP_005659594.1	Annexin A2; Annexin	ANXA2	32602000000	32815000000	35402000000	33747000000	36399000000	37769000000	37321000000	36020000000	0.132489	1.09618	Up ↑
XP_003134080.1	microtubule-associated protein 1B isoform X1	MAP1B	129160000	124560000	141770000	136970000	143370000	149570000	151960000	137900000	0.130328	1.09454	Up ↑
XP_005671355.1	myoferlin	-	2831400000	2885500000	2928100000	2795700000	2982700000	3185800000	3209200000	3089500000	0.123962	1.08972	Up ↑
XP_005668879.1	Junction plakoglobin	JUP	663540000	609590000	603580000	636480000	672360000	692230000	709130000	656030000	0.119249	1.08617	Up ↑
NP_001230113.1	hexokinase-1	HK1	294540000	307280000	303530000	311010000	328360000	332110000	319470000	338070000	0.115791	1.08357	Up ↑
NP_999472.1	10 kDa heat shock protein, mitochondrial	HSPE1	838250000	829090000	879130000	814260000	921000000	893010000	929400000	893720000	0.114026	1.08224	Up ↑
NP_001185848.1	prosaposin precursor	PSAP	992970000	1004800000	1022000000	1081200000	1105400000	1081400000	1140300000	1100100000	0.110429	1.07955	Up ↑
XP_005671605.1	ornithine aminotransferase, mitochondrial isoform X1	OAT	400870000	421360000	414350000	391640000	442840000	445640000	443970000	418990000	0.105246	1.07568	Up ↑
XP_003355292.1	ATP synthase F(0) complex subunit B1, mitochondrial	ATP5F1	305460000	314290000	305350000	307910000	321290000	329410000	343640000	323200000	0.0956623	1.06856	Up ↑
XP_005666372.1	spectrin beta chain, erythrocytic	-	105010000	111380000	116050000	108190000	117140000	120290000	116750000	116350000	0.094719	1.06786	Up ↑
XP_003353391.2	unconventional myosin-Ie	MYO1E	265690000	262120000	272690000	249980000	278730000	294290000	279320000	268420000	0.0934287	1.0669	Up ↑
XP_005661752.1	stress-70 protein, mitochondrial	HSPA9	3404900000	3446100000	3483700000	3427500000	3560500000	3741200000	3833100000	3529400000	0.0915873	1.06554	Up ↑
XP_005659330.1	heterogeneous nuclear ribonucleoprotein Q isoform X3	-	756770000	761730000	751140000	722790000	760470000	792960000	833490000	796960000	0.0894685	1.06398	Up ↑
XP_005655553.1	probable ATP-dependent RNA helicase DDX17 isoform X2	-	539640000	545250000	557640000	528560000	553650000	587030000	572210000	556740000	0.0640376	1.04539	Up ↑
XP_003360037.2	protein-glutamine gamma-glutamyltransferase 2	TGM2	583580000	604600000	614590000	595710000	611270000	625050000	635220000	625050000	0.0578385	1.04091	Up ↑
NP_001172071.1	ATP synthase subunit alpha, mitochondrial	ATP5A2; ATP5A1	3700200000	3597100000	3597900000	3697600000	3706600000	3834700000	3824600000	3705800000	0.0465854	1.03282	Up ↑
NP_001231082.1	malate dehydrogenase, mitochondrial	MMDH; MDH2; MDH	1972000000	1941500000	1998400000	1921800000	1871500000	1899900000	1930200000	1911900000	-0.0411341	0.971891	Down ↓
XP_005667688.1	asparagine synthetase [glutamine-hydrolyzing] isoform X1	ASNS	665910000	654530000	656790000	653340000	646560000	623650000	636980000	647560000	-0.0421933	0.971177	Down ↓
NP_999414.1	Sodium/potassium-transporting ATPase subunit alpha-1	ATP1A1	1012800000	1028300000	1050900000	1039300000	969020000	1001400000	995490000	1015300000	-0.0533889	0.96367	Down ↓
XP_005674623.1	AHNAK nucleoprotein	-	21382000000	21399000000	22223000000	21148000000	19993000000	21053000000	21073000000	20425000000	-0.0617209	0.958121	Down ↓
XP_005652820.1	60S acidic ribosomal protein P2 isoform X1	RPLP2	2111100000	2161700000	2198700000	2163900000	2000600000	2123900000	2099400000	2032100000	-0.06482	0.956065	Down ↓
XP_005661751.1	eukaryotic peptide chain release factor subunit 1 isoform X2	ETF1	409610000	396850000	396690000	394240000	381500000	374660000	380470000	384270000	-0.0707913	0.952116	Down ↓
XP_003133770.2	nucleolin isoform X1	LOC100519984	3804500000	3803600000	3731600000	3836400000	3473000000	3673000000	3692800000	3509700000	-0.0809012	0.945467	Down ↓
NP_001182041.1	Protein disulfide-isomerase	grp-58; PDIA3	6373400000	6444900000	6410200000	6437100000	6070900000	6067400000	6096200000	5992100000	-0.083244	0.943933	Down ↓
NP_001231189.1	arginine--tRNA ligase, cytoplasmic	RARS; ARGRS	346540000	335080000	345850000	352410000	324260000	321120000	337700000	317360000	-0.085543	0.94243	Down ↓
XP_005656841.1	bifunctional glutamate/proline--tRNA ligase	-	733570000	749060000	774700000	709190000	693800000	728460000	683820000	688190000	-0.0863001	0.941935	Down ↓
XP_003481580.1	hsc70-interacting protein isoform 2	-	358760000	368940000	371690000	366050000	342380000	352100000	332690000	349320000	-0.0903398	0.939302	Down ↓
NP_001231109.1	T-complex protein 1 subunit gamma	CCTG; CCT3	1067600000	1099100000	1092200000	1080300000	1034800000	1007400000	1023000000	1007000000	-0.0916207	0.938468	Down ↓
NP_001230406.1	26S proteasome non-ATPase regulatory subunit 2	PSMD2	756810000	773090000	794720000	800570000	691430000	754160000	758530000	728270000	-0.0918669	0.938308	Down ↓
XP_003126310.1	extended synaptotagmin-1	ESYT1	410220000	413040000	433420000	403920000	376720000	388330000	411080000	376190000	-0.0972786	0.934795	Down ↓
XP_005673244.1	staphylococcal nuclease domain-containing protein 1	-	443610000	456520000	452920000	450530000	405020000	432070000	426620000	419660000	-0.0995111	0.933349	Down ↓
XP_005655344.1	eukaryotic translation initiation factor 5A-1 isoform X7	-	2006800000	2037000000	2062800000	2118100000	1855700000	1935400000	1946700000	1921400000	-0.102769	0.931244	Down ↓
XP_003131485.1	keratin, type I cytoskeletal 19	KRT19	9861600000	9810400000	10508000000	10249000000	9093500000	9689900000	9375700000	9447100000	-0.10442	0.930179	Down ↓
XP_003354050.1	elongation factor 2	EEF2	12554000000	12514000000	13159000000	12795000000	11717000000	11895000000	11985000000	11850000000	-0.104803	0.929932	Down ↓
NP_001163993.1	T-complex protein 1 subunit eta	CCT7	1093300000	1117600000	1141900000	1196100000	1055300000	1097000000	1075200000	1000800000	-0.10544	0.929521	Down ↓
NP_999106.1	Dolichyl-diphosphooligosaccharide--protein glycosyltransferase subunit 2	RPN2; RPN-II	859990000	815080000	807470000	795970000	770870000	781820000	739250000	737660000	-0.113913	0.924078	Down ↓
XP_001925971.3	plastin-3 isoform X2	PLS3	1261600000	1283500000	1330000000	1259100000	1159500000	1210800000	1205200000	1165300000	-0.115009	0.923377	Down ↓
XP_001928755.4	ezrin	LOC100153898	1382600000	1384800000	1490800000	1447300000	1299000000	1377700000	1261600000	1328300000	-0.115481	0.923074	Down ↓
NP_999159.1	Acetyltransferase component of pyruvate dehydrogenase complex	DLAT	250210000	263210000	275690000	271530000	236180000	251050000	248020000	243660000	-0.115687	0.922943	Down ↓
XP_005668854.1	vacuolar protein-sorting-associated protein 25	-	9494800	9928900	10102000	10154000	9380000	9575400	9098300	8561600	-0.115955	0.922772	Down ↓
NP_001189469.1	transmembrane emp24 domain-containing protein 7 precursor	TMED7	111960000	124570000	113500000	119340000	109390000	103820000	107990000	111700000	-0.116692	0.9223	Down ↓
XP_005659178.1	ezrin	-	2410300000	2319100000	2492700000	2218000000	2155200000	2146800000	2205100000	2172200000	-0.121223	0.919408	Down ↓
XP_003123584.1	coatomer subunit epsilon isoform X1	COPE	175740000	180360000	166870000	172120000	150170000	159770000	171500000	155110000	-0.126926	0.915781	Down ↓
XP_005653713.1	ribonucleoside-diphosphate reductase large subunit-like	-	212260000	217960000	205290000	197560000	193330000	185150000	204190000	180170000	-0.127057	0.915697	Down ↓
NP_001127815.1	actin-related protein 3	ACTR3; ARP3	728080000	731610000	792850000	731190000	657480000	715670000	699570000	653260000	-0.130342	0.913615	Down ↓
XP_005673018.1	14-3-3 protein beta/alpha	YWHAB	865770000	844790000	844940000	905570000	755730000	831410000	819950000	752240000	-0.131599	0.912819	Down ↓
NP_001009576.1	Radixin	RDX	202010000	190130000	198450000	200530000	170050000	188290000	170310000	191710000	-0.135178	0.910557	Down ↓
NP_001191212.1	40S ribosomal protein S4	RPS4X; RPS4	1419300000	1428500000	1477000000	1441500000	1345700000	1327000000	1268400000	1304700000	-0.136483	0.909734	Down ↓
NP_001116458.1	tRNA-splicing ligase RtcB homolog	RTCB	155740000	160750000	168680000	167760000	146260000	156990000	151380000	139350000	-0.136514	0.909715	Down ↓
XP_003481715.1	dynamin 1-like	-	134950000	142510000	145030000	141570000	129910000	130580000	130230000	122400000	-0.136552	0.90969	Down ↓
XP_005673555.1	acyl-coenzyme A thioesterase 9, mitochondrial	-	330690000	340060000	341510000	349270000	298790000	317530000	306040000	315120000	-0.137824	0.908889	Down ↓
NP_001038007.1	60S ribosomal protein L6	RPL6	1083100000	1078100000	1168600000	1110000000	1074500000	941720000	1010900000	1004000000	-0.139314	0.907951	Down ↓
NP_001230356.1	T-complex protein 1 subunit alpha	TCP1	1060100000	1057800000	1147500000	1108200000	976400000	998900000	1048500000	945390000	-0.139977	0.907534	Down ↓
XP_005671131.1	Vinculin	VIN; VCL	2571000000	2626400000	2938900000	2738900000	2374400000	2575300000	2462200000	2453800000	-0.140549	0.907174	Down ↓
NP_001106688.1	60S ribosomal protein L7	RPL7	1102300000	1085500000	1103000000	1175400000	959310000	1030900000	1044600000	1008700000	-0.14344	0.905358	Down ↓
XP_005655696.1	proliferation-associated protein 2G4-like	-	384240000	386910000	405440000	392840000	353770000	354680000	354790000	353860000	-0.147299	0.902939	Down ↓
XP_003123013.1	Proteasome subunit alpha type	PSMA1	540040000	531900000	568390000	575670000	473780000	517100000	516620000	493060000	-0.147554	0.90278	Down ↓
XP_003355886.2	rhophilin-2, partial	-	194450000	209260000	203980000	218940000	194840000	190620000	179640000	180000000	-0.149808	0.901371	Down ↓
NP_001153087.1	keratin, type II cytoskeletal 8	KRT8	13746000000	13822000000	13924000000	13799000000	12425000000	12390000000	12611000000	12387000000	-0.150522	0.900924	Down ↓
XP_005654963.1	60S ribosomal protein L18a isoform X2	-	530130000	501450000	469150000	470340000	446620000	432050000	440320000	456640000	-0.150648	0.900846	Down ↓
NP_001107756.1	60S ribosomal protein L5	RPL5	948930000	969620000	1004000000	1014500000	806590000	921140000	951980000	866090000	-0.151004	0.900624	Down ↓
NP_001231205.1	thioredoxin-like protein 1	TXNL1	310420000	318920000	355650000	330580000	274740000	299960000	306160000	302140000	-0.153238	0.89923	Down ↓
XP_005666120.1	heat shock protein HSP 90-beta isoform X1	HSP90AB1; HSPCB	11120000000	11253000000	11878000000	10926000000	9341600000	10570000000	10182000000	10458000000	-0.15583	0.897616	Down ↓
XP_003481707.1	ras-related protein Rab-21	RAB21	249740000	231020000	224910000	229110000	211250000	223790000	198810000	204890000	-0.156403	0.897259	Down ↓
XP_003353244.1	costars family protein ABRACL isoform X1	ABRACL	400510000	393610000	392750000	378260000	355630000	351010000	346670000	349020000	-0.158457	0.895983	Down ↓
XP_001925705.3	serine--tRNA ligase, cytoplasmic	SARS	227270000	236010000	232450000	226040000	203760000	200560000	220630000	199800000	-0.16045	0.894746	Down ↓
XP_005652636.1	keratin, type I cytoskeletal 18, partial	-	10349000000	10643000000	11222000000	10902000000	10099000000	9460200000	9687700000	9321000000	-0.160823	0.894515	Down ↓
XP_003123029.2	switch-associated protein 70	SWAP70	52903000	54970000	48497000	54397000	43839000	49719000	49014000	45688000	-0.162923	0.893214	Down ↓
NP_999119.1	Aconitate hydratase, mitochondrial	ACO2	441830000	441710000	451710000	446260000	370730000	410850000	414810000	394470000	-0.163294	0.892984	Down ↓
XP_003483601.2	cytosolic purine 5'-nucleotidase isoform X3	NT5C2	18743000	16778000	19338000	19438000	17366000	16858000	15794000	16306000	-0.163773	0.892687	Down ↓
XP_005661199.1	ADP-ribosylation factor 1 isoform X1	ARF1	479770000	487950000	487570000	513640000	437200000	437900000	459550000	422570000	-0.164117	0.892475	Down ↓
XP_003126370.3	dynactin subunit 2-like, partial	-	136990000	140870000	147520000	134450000	122140000	124390000	123670000	129050000	-0.165226	0.891789	Down ↓
NP_999148.1	26S protease regulatory subunit 8	PSMC5; TBP10	273580000	272360000	313080000	293230000	253810000	262150000	261680000	249800000	-0.1654	0.891681	Down ↓
XP_003356343.2	tyrosine--tRNA ligase, cytoplasmic	YARS	130500000	123980000	129320000	123330000	103160000	119680000	118330000	110730000	-0.166352	0.891093	Down ↓
XP_005662075.1	T-complex protein 1 subunit zeta	CCT6A	1302900000	1346000000	1332700000	1343900000	1178700000	1241300000	1169400000	1154200000	-0.166935	0.890733	Down ↓
XP_005671342.1	insulin-degrading enzyme isoform X4	IDE	156140000	143390000	158710000	139180000	134770000	129190000	138220000	129890000	-0.167129	0.890613	Down ↓
NP_001009578.1	Moesin	MSN	2869400000	2757500000	2880100000	2764900000	2481800000	2584900000	2495400000	2470700000	-0.168006	0.890072	Down ↓
XP_003132249.2	Inosine-5'-monophosphate dehydrogenase	IMPDH2	257070000	255950000	295510000	260230000	225560000	254560000	231860000	239290000	-0.168011	0.890069	Down ↓
XP_005672026.1	histone acetyltransferase type B catalytic subunit isoform X2	HAT1	124360000	124200000	134240000	133080000	123350000	104820000	119750000	111000000	-0.168793	0.889587	Down ↓
XP_005654082.1	coatomer subunit gamma-1	-	268440000	254030000	237840000	261400000	250910000	226560000	219460000	211500000	-0.169539	0.889127	Down ↓
XP_003126904.2	Lysine--tRNA ligase	KARS	208990000	192220000	207700000	201120000	181930000	177680000	185770000	172970000	-0.173288	0.886819	Down ↓
XP_005654000.1	puromycin-sensitive aminopeptidase isoform X3	-	433270000	459940000	457800000	481060000	385240000	424040000	406730000	407110000	-0.174705	0.885949	Down ↓
XP_005660979.1	26S protease regulatory subunit 6A isoform X2	PSMC3	455020000	464240000	451470000	455730000	375360000	423110000	434840000	383570000	-0.175838	0.885253	Down ↓
XP_001924364.2	C-1-tetrahydrofolate synthase, cytoplasmic	MTHFD1	250970000	246550000	240600000	238690000	206990000	214780000	222280000	218180000	-0.180005	0.8827	Down ↓
XP_003359316.2	wings apart-like protein homolog	-	10720000	11402000	11701000	11127000	9344400	10296000	9771600	10261000	-0.180164	0.882603	Down ↓
XP_001924480.2	proteasome subunit beta type-5	PSMB5	416750000	417590000	439200000	398620000	365390000	377210000	380260000	352420000	-0.180724	0.88226	Down ↓
XP_003124136.1	casein kinase I isoform alpha isoform X7	CSNK1A1	55090000	56288000	50869000	58022000	50635000	50429000	47543000	45542000	-0.182102	0.881418	Down ↓
XP_003360910.1	ras-related protein Rab-5B	RAB5B	45392000	48448000	48091000	48815000	45332000	42634000	38485000	41660000	-0.182239	0.881334	Down ↓
XP_005669213.1	Beta-enolase	ENO3	1572500000	1647000000	1565900000	1721400000	1339000000	1476700000	1469000000	1446200000	-0.183186	0.880756	Down ↓
XP_005664319.1	ubiquitin-conjugating enzyme E2 N	UBE2N	797680000	801570000	792230000	821000000	674430000	724810000	707200000	721830000	-0.183768	0.880401	Down ↓
NP_001138374.1	proteasome subunit beta type-3	PSMB3	329840000	338160000	328060000	337390000	309440000	286810000	301740000	274530000	-0.185551	0.879313	Down ↓
XP_003353842.1	stress-induced-phosphoprotein 1	STIP1	1406800000	1438600000	1478300000	1420400000	1222000000	1341100000	1246000000	1241000000	-0.185769	0.87918	Down ↓
XP_005661711.1	heat shock 70 kDa protein 4	HSPA4	3438600000	3556100000	3596600000	3456300000	2945400000	3137200000	3197500000	3048200000	-0.18835	0.877609	Down ↓
NP_001241645.1	60 kDa heat shock protein, mitochondrial	HSPD1; HSP60	3515500000	3542300000	3608200000	3590800000	3095800000	3221700000	3113000000	3076300000	-0.188937	0.877252	Down ↓
NP_999020.1	Myosin-7	MYH7	107870000	128300000	120100000	115780000	100200000	113540000	102240000	97355000	-0.191628	0.875617	Down ↓
NP_001230508.1	thymidylate synthase	TYMS	301270000	304080000	314190000	290690000	251080000	249810000	280090000	278100000	-0.19247	0.875106	Down ↓
NP_001278854.1	proliferating cell nuclear antigen	PCNA	711680000	749610000	704500000	757970000	622060000	655220000	647270000	631160000	-0.194101	0.874118	Down ↓
NP_999166.1	Transferrin receptor protein 1	TFRC; trfr	520260000	515840000	568800000	521970000	440070000	484430000	452460000	481150000	-0.194896	0.873636	Down ↓
NP_001011509.1	Heme-binding protein 1	HEBP1; HBP	265490000	276120000	265050000	280070000	223220000	241900000	247080000	236480000	-0.196	0.872968	Down ↓
NP_001035834.1	Integral membrane protein 2B	imBRI2; ITM2B; Bri	15829000	16295000	18441000	17073000	16322000	13556000	14173000	14981000	-0.196337	0.872764	Down ↓
XP_005662547.1	glutamine--fructose-6-phosphate aminotransferase [isomerizing] 1 isoform X1	GFPT1; GFAT1	748300000	751150000	758000000	757090000	653920000	665060000	660570000	649340000	-0.197484	0.87207	Down ↓
XP_003127291.1	SUMO-activating enzyme subunit 1 isoform X1	SAE1	105180000	105060000	105520000	106090000	98041000	89801000	87657000	92213000	-0.198154	0.871665	Down ↓
XP_005654083.1	ras-related protein Rab-7a-like	-	526970000	550830000	604420000	586660000	487690000	517510000	489660000	482550000	-0.198368	0.871536	Down ↓
NP_001244205.1	ATP-citrate synthase isoform 1	ACLY; ACL	743000000	734380000	795430000	782470000	675260000	645980000	673020000	666670000	-0.199374	0.870928	Down ↓
XP_005655046.1	Glutaredoxin-1	GLRX; GLRX1; TTF; GRX1	999460000	1031900000	1106700000	1034500000	874020000	964850000	942290000	849410000	-0.200737	0.870106	Down ↓
XP_003360255.2	Proteasome subunit alpha type	PSMA2	380660000	358240000	374990000	377320000	326210000	330680000	319140000	319960000	-0.202429	0.869086	Down ↓
XP_001925115.3	inorganic pyrophosphatase	PPA1	287040000	296590000	275070000	268500000	237850000	253100000	252810000	235550000	-0.202906	0.868799	Down ↓
NP_001231804.1	ras-related protein Rab-11B	RAB11B	400810000	389670000	391110000	420740000	332000000	363560000	348500000	347890000	-0.203064	0.868704	Down ↓
NP_999145.1	UTP--glucose-1-phosphate uridylyltransferase	UGP2	106570000	110130000	111120000	109270000	90787000	105640000	90625000	92551000	-0.203439	0.868478	Down ↓
XP_005655474.1	cold shock domain-containing protein E1 isoform X4	CSDE1	173330000	197680000	178650000	187290000	153770000	158030000	166260000	161790000	-0.203833	0.868241	Down ↓
NP_001231384.1	Proteasome subunit beta type	PSMB4	293360000	277490000	257860000	270280000	222220000	252050000	252950000	226040000	-0.205237	0.867396	Down ↓
XP_003127872.3	adenylyl cyclase-associated protein 1, partial	-	1364100000	1369000000	1339300000	1344400000	1170300000	1127200000	1204800000	1193400000	-0.206101	0.866877	Down ↓
XP_003121927.1	S-methyl-5'-thioadenosine phosphorylase	-	131320000	134160000	123050000	134990000	109940000	112170000	111780000	119840000	-0.206411	0.866691	Down ↓
XP_001928995.1	astrocytic phosphoprotein PEA-15	PEA15	470740000	466490000	496200000	474430000	379170000	442630000	449870000	381050000	-0.207113	0.866269	Down ↓
XP_005663369.1	farnesyl pyrophosphate synthase isoform X1	FDPS	95385000	95554000	86842000	90473000	78199000	85852000	86023000	68889000	-0.207312	0.866149	Down ↓
NP_001116568.1	hsp90 co-chaperone Cdc37	CDC37	133800000	151090000	147240000	154240000	132890000	133270000	123880000	117150000	-0.209285	0.864966	Down ↓
XP_003481338.1	14-3-3 protein theta	YWHAQ	485770000	441130000	516410000	506300000	447490000	437430000	383850000	416420000	-0.210274	0.864373	Down ↓
NP_001038075.1	Nucleoside diphosphate kinase B	NME2	3389200000	3450100000	3608700000	3681100000	2927400000	2994200000	3180400000	3107000000	-0.210725	0.864103	Down ↓
NP_001090973.1	heat shock protein 105 kDa	HSPH1	232050000	249050000	251410000	241710000	198220000	224790000	203690000	214220000	-0.212279	0.863173	Down ↓
NP_001182266.1	peptidyl-prolyl cis-trans isomerase FKBP4	FKBP4	551090000	605550000	592160000	556540000	473470000	514690000	509710000	491550000	-0.212632	0.862962	Down ↓
XP_003124603.2	cytochrome b-c1 complex subunit 2, mitochondrial	LOC100524613	193650000	186330000	203260000	195030000	180630000	170610000	166030000	154020000	-0.213335	0.862541	Down ↓
XP_005669625.1	guanine nucleotide-binding protein G(i) subunit alpha-2 isoform X1	GNAI2; GBI2	377370000	353170000	400120000	355840000	315790000	327980000	323720000	313730000	-0.214401	0.861904	Down ↓
XP_005659040.1	ubiquitin-conjugating enzyme E2 variant 2 isoform X3	UBE2V2	203790000	186690000	200110000	185930000	161210000	170310000	176290000	161090000	-0.215233	0.861407	Down ↓
NP_001231937.1	26S protease regulatory subunit 7	PSMC2	284180000	282770000	287640000	269160000	247670000	250680000	238140000	231410000	-0.215391	0.861313	Down ↓
NP_001001643.1	Rab GDP dissociation inhibitor beta	GDI2	1352900000	1398100000	1409800000	1421400000	1194600000	1228100000	1231300000	1153400000	-0.215577	0.861202	Down ↓
XP_005661680.1	histidine triad nucleotide-binding protein 1	HINT1	869290000	908810000	898450000	834790000	665340000	839570000	743410000	771970000	-0.217335	0.860153	Down ↓
XP_005655061.1	SEC24 family, member A isoform X4	-	113350000	120960000	113350000	109310000	100810000	102490000	91047000	98101000	-0.219598	0.858805	Down ↓
XP_005654911.1	eukaryotic translation initiation factor 3 subunit G	-	164560000	169470000	174830000	160530000	138340000	140960000	151280000	144230000	-0.219762	0.858707	Down ↓
XP_003359292.1	40S ribosomal protein S24 isoform X6	RPS24	418700000	434690000	424060000	435080000	348100000	373310000	391730000	357380000	-0.219803	0.858683	Down ↓
XP_003122689.1	bifunctional ATP-dependent dihydroxyacetone kinase/FAD-AMP lyase (cyclizing)	DAK; TKFC	38216000	40205000	41173000	43528000	33460000	35014000	39450000	32140000	-0.219865	0.858646	Down ↓
XP_005652645.1	triosephosphate isomerase isoform X1	-	2692700000	2589000000	2653000000	2551500000	2242500000	2366300000	2295800000	2099300000	-0.21987	0.858643	Down ↓
XP_003135349.1	ribose-phosphate pyrophosphokinase 1	PRPS1	207140000	211320000	226810000	224280000	181470000	191170000	198770000	175010000	-0.220281	0.858398	Down ↓
XP_005654189.1	annexin A8 isoform X3	-	9675000000	9954500000	10502000000	9903600000	8717300000	8629400000	8802100000	8214500000	-0.220397	0.858329	Down ↓
XP_003124563.2	elongation factor Tu, mitochondrial	TUFM	261770000	283020000	309410000	293510000	227910000	264770000	250500000	241540000	-0.220973	0.857987	Down ↓
NP_001230825.1	glutaredoxin-3	GLRX3	368810000	354550000	362860000	360490000	301720000	300340000	335480000	302990000	-0.221819	0.857484	Down ↓
XP_005664749.1	60S ribosomal protein L18	LOC100738912	752750000	759360000	904490000	787220000	663060000	713230000	694930000	675600000	-0.222031	0.857358	Down ↓
NP_999232.1	calpastatin	CAST	542200000	494620000	609960000	559400000	425920000	514890000	497620000	452260000	-0.222638	0.856997	Down ↓
XP_005674067.1	isocitrate dehydrogenase [NAD] subunit gamma, mitochondrial isoform X3	-	30959000	26835000	26304000	28390000	21025000	26292000	23793000	25174000	-0.224403	0.855949	Down ↓
XP_003127605.1	6-phosphogluconate dehydrogenase, decarboxylating	PGD	432960000	446180000	458240000	457830000	357670000	380580000	404070000	393240000	-0.225388	0.855365	Down ↓
NP_001038040.1	Isocitrate dehydrogenase [NAD] subunit, mitochondrial	IDH3B	98020000	98216000	101000000	89390000	74556000	88143000	86685000	80979000	-0.226887	0.854477	Down ↓
XP_001924368.2	NADP-dependent malic enzyme	ME1	220000000	214970000	213410000	225610000	182670000	195620000	188140000	180110000	-0.227397	0.854175	Down ↓
XP_003129266.2	annexin A5	ANXA5	2534800000	2400900000	2468900000	2565500000	2239400000	2115100000	2069700000	2086700000	-0.228296	0.853642	Down ↓
NP_001230836.1	heat shock 70kDa protein 8	HSPA8	15415000000	15169000000	15542000000	15740000000	13088000000	13704000000	13208000000	12767000000	-0.229511	0.852924	Down ↓
XP_005668471.1	S-formylglutathione hydrolase	Es10; ESD	160710000	150150000	161660000	138810000	123740000	138530000	129180000	129850000	-0.229838	0.852731	Down ↓
NP_001230484.1	heterogeneous nuclear ribonucleoprotein H3	HNRNPH3	96842000	81592000	77967000	85124000	76535000	72743000	73751000	67831000	-0.231666	0.851651	Down ↓
XP_005655265.1	S-adenosylmethionine synthase isoform type-2 isoform X1	-	248050000	258010000	305550000	269570000	241230000	219410000	234470000	224740000	-0.233136	0.850783	Down ↓
XP_005664049.1	nucleosome assembly protein 1-like 1 isoform X2	-	1695800000	1716200000	1777600000	1745000000	1502900000	1557700000	1420400000	1416000000	-0.233831	0.850373	Down ↓
NP_001231080.1	26S protease regulatory subunit 4	PSMC1	191760000	219340000	215010000	206300000	170560000	178300000	178070000	180590000	-0.234523	0.849966	Down ↓
XP_005672767.1	leucine-rich repeat transmembrane protein FLRT3	FLRT3	57575000	54207000	47733000	55159000	42131000	51859000	46269000	42128000	-0.235145	0.8496	Down ↓
NP_001157479.1	isocitrate dehydrogenase [NADP], mitochondrial	IDH2	404180000	425020000	428970000	406090000	334430000	367790000	373560000	337790000	-0.235538	0.849368	Down ↓
XP_005659919.1	60S ribosomal protein L4	RPL4	1153700000	1130500000	1199400000	1065600000	901530000	1040300000	981400000	937380000	-0.236784	0.848635	Down ↓
NP_001231332	electron transfer flavoprotein subunit alpha, mitochondrial	ETFA	214170000	218660000	237340000	238590000	194800000	184010000	203650000	188540000	-0.237168	0.848409	Down ↓
XP_003355612	serine-threonine kinase receptor-associated protein	STRAP	429890000	443720000	453440000	413770000	348500000	385370000	396010000	341950000	-0.242156	0.845481	Down ↓
NP_001231278	eukaryotic translation initiation factor 1A, Y-linked	EIF1AY	144090000	134550000	146730000	130950000	98858000	125470000	123260000	122670000	-0.242462	0.845301	Down ↓
XP_005665310	Polyadenylate-binding protein	PABPC4	101240000	103860000	119590000	107250000	91355000	99442000	89625000	84673000	-0.242559	0.845245	Down ↓
NP_001230149	lon protease homolog, mitochondrial	LONP1	139860000	150880000	141980000	144160000	123390000	126090000	113490000	124120000	-0.244083	0.844352	Down ↓
XP_003358329	vesicle-associated membrane protein 2	VAMP2	63914000	60763000	68128000	67654000	49769000	57321000	51455000	61320000	-0.244438	0.844144	Down ↓
XP_005663411	S100 calcium binding protein A16 isoform X2	-	290530000	259350000	275260000	270070000	267120000	220880000	201660000	234090000	-0.245633	0.843446	Down ↓
XP_003353954	CD44 antigen isoform X5	-	114180000	123650000	134160000	121790000	96552000	106820000	98203000	114720000	-0.246262	0.843078	Down ↓
NP_001093658	calpain-2 catalytic subunit	CAPN2	747990000	809780000	815390000	808430000	700920000	638580000	687040000	652150000	-0.24822	0.841934	Down ↓
XP_001927816	phosphatidylinositol transfer protein beta isoform X2	PITPNB	247510000	255930000	275000000	258870000	213850000	213930000	239050000	206470000	-0.248298	0.841889	Down ↓
NP_001093402	Phosphoglycerate kinase 1	PGK1	3102800000	3019800000	3114600000	2981000000	2339700000	2742000000	2640000000	2560400000	-0.248897	0.84154	Down ↓
XP_005673619	ATP-dependent RNA helicase DDX3X isoform X2	-	917680000	862230000	831420000	854520000	698090000	775570000	727040000	715600000	-0.24907	0.841439	Down ↓
XP_001927987	protein CutA isoform X1	-	45101000	56721000	51815000	46752000	38380000	44832000	44861000	40468000	-0.249704	0.841069	Down ↓
NP_999478	Thioredoxin	TXN; TRX1	3823300000	3957500000	3568900000	4051700000	3332500000	3466400000	3206200000	2944100000	-0.250199	0.840781	Down ↓
XP_003126064	mitochondrial import receptor subunit TOM22 homolog	-	152760000	153510000	163380000	171710000	136010000	136030000	145430000	121280000	-0.251518	0.840012	Down ↓
NP_999215	Glutathione S-transferase omega-1	SPG-R; GSTO 1-1; GSTO1	780250000	821160000	892470000	853980000	696040000	703660000	730360000	681090000	-0.252079	0.839686	Down ↓
XP_005668311	isopentenyl-diphosphate Delta-isomerase 1-like isoform X2	-	55227000	50725000	55183000	57530000	44632000	49042000	47597000	42328000	-0.252164	0.839636	Down ↓
NP_001231843	synaptobrevin homolog YKT6	YKT6	132700000	160340000	132330000	147490000	109210000	129390000	127300000	115070000	-0.252236	0.839594	Down ↓
XP_005660952	catenin delta-1 isoform X6	CTNND1	296970000	274750000	267630000	280340000	241450000	232030000	232810000	233750000	-0.252305	0.839554	Down ↓
NP_999483	Calpain small subunit 1	CAPNS1	345860000	369500000	397810000	381120000	304880000	327950000	327110000	293470000	-0.253602	0.8388	Down ↓
XP_001929380	coronin-1C	CORO1C	439970000	433190000	407490000	413350000	362490000	405420000	317500000	334240000	-0.254899	0.838046	Down ↓
XP_003132574	protein kinase C iota type	-	31180000	31260000	25797000	31810000	24733000	26044000	24185000	25619000	-0.255242	0.837847	Down ↓
XP_003358672	GMP synthase [glutamine-hydrolyzing] isoform 2	-	43091000	41173000	39789000	38548000	33718000	38962000	34464000	28904000	-0.25722	0.836698	Down ↓
XP_003356947	UDP-glucose 6-dehydrogenase	UGDH	77822000	72615000	67632000	71822000	52932000	62011000	65268000	62220000	-0.257936	0.836283	Down ↓
NP_001230486	D-dopachrome decarboxylase	DDT	119060000	109890000	134990000	119540000	95876000	105540000	100220000	102630000	-0.258151	0.836159	Down ↓
XP_005671444	60S acidic ribosomal protein P0	-	491780000	511330000	554960000	470110000	434190000	448240000	425310000	388130000	-0.25816	0.836154	Down ↓
XP_005655307	dpy-30 homolog isoform X2	-	92788000	83133000	79973000	79175000	67764000	75073000	64963000	71722000	-0.261496	0.834222	Down ↓
NP_001182709	Protein-L-isoaspartate(D-aspartate) O-methyltransferase	PIMT; PCMT; PCMT1	59313000	59229000	51912000	65281000	50337000	42427000	51343000	52270000	-0.26354	0.833041	Down ↓
NP_001231333	Serine/threonine-protein phosphatase	PPP6C	38142000	32428000	32194000	39036000	31559000	29161000	30941000	26451000	-0.263702	0.832948	Down ↓
NP_999131	trifunctional enzyme subunit beta, mitochondrial	LCTHIO; HADHB	68029000	62810000	71920000	73160000	59185000	57599000	61737000	50823000	-0.266732	0.8312	Down ↓
XP_001928946	MMS19 nucleotide excision repair protein homolog	-	17803000	19007000	15705000	17687000	14947000	14169000	15214000	13998000	-0.267324	0.83086	Down ↓
NP_001239144	hydroxymethylglutaryl-CoA synthase, cytoplasmic	HMGCS1	153600000	135710000	150220000	149150000	136420000	132050000	112190000	107360000	-0.270543	0.829007	Down ↓
XP_001927992	Lactoylglutathione lyase	GLO1	148210000	165160000	154200000	164810000	128750000	138880000	125240000	131080000	-0.271363	0.828537	Down ↓
XP_005657643	calcium-binding protein 39 isoform X3	-	36966000	36359000	40084000	42420000	35519000	30976000	30135000	32459000	-0.271598	0.828402	Down ↓
XP_005664289	Leukotriene A(4) hydrolase	AmpT; LTA4H	294680000	288530000	293500000	292300000	235810000	253710000	240570000	238070000	-0.27197	0.828188	Down ↓
NP_999127	Trifunctional enzyme subunit alpha, mitochondrial	HADHA	307540000	308840000	307790000	318030000	257900000	256620000	257860000	254620000	-0.274461	0.826759	Down ↓
NP_001165456	guanine nucleotide-binding protein G(s) subunit alpha isoform g	GNAS; PORGSA1; NESP55; SCG6	91313000	84523000	99920000	94434000	82759000	75091000	75850000	72114000	-0.275611	0.8261	Down ↓
XP_003123949	isochorismatase domain-containing protein 1	ISOC1	55769000	55516000	51383000	61884000	47096000	43823000	46886000	47441000	-0.277607	0.824958	Down ↓
XP_001929104	pyruvate kinase PKM isoform X7	PKM; PK-S	10974000000	10837000000	11517000000	11187000000	8808000000	9522400000	9307500000	9035500000	-0.279558	0.823844	Down ↓
XP_003480471	tight junction protein ZO-1, partial	LOC100736682	218600000	212140000	224300000	236720000	187870000	185720000	184360000	176170000	-0.28064	0.823226	Down ↓
XP_005673516	histone-binding protein RBBP7 isoform X4	RBBP7	158190000	143680000	156070000	157510000	120810000	123120000	129690000	132730000	-0.281507	0.822731	Down ↓
NP_001230504	creatine kinase B-type	CKB	2869500000	2863100000	2853200000	3071500000	2339500000	2419400000	2482400000	2349400000	-0.281526	0.822721	Down ↓
XP_001929258	purine nucleoside phosphorylase	PNP; NP	141780000	143890000	146320000	148420000	125890000	114390000	121780000	115260000	-0.282116	0.822384	Down ↓
XP_005658985	DNA replication licensing factor MCM5-like, partial	-	119030000	116410000	125850000	132100000	97222000	108030000	95719000	104660000	-0.282561	0.822131	Down ↓
XP_005660679	glutathione S-transferase P	-	4598100000	4971100000	4765500000	4930800000	3893100000	4253000000	3843000000	3831400000	-0.284224	0.821183	Down ↓
NP_001231282	Proteasome subunit beta type	PSMB1	254450000	268440000	270820000	263930000	212630000	240120000	210690000	204910000	-0.2845	0.821026	Down ↓
NP_001070681	Macrophage migration inhibitory factor	MIF	860650000	961820000	1032400000	890620000	908230000	737410000	697510000	731430000	-0.284765	0.820875	Down ↓
XP_005653799	protein PRRC2C isoform X13	PRRC2C; BAT2L2	55373000	51092000	43298000	48602000	43658000	41578000	36525000	41053000	-0.284933	0.82078	Down ↓
NP_001027548	Hypoxanthine-guanine phosphoribosyltransferase	HPRT; HPRT1	101490000	109870000	103690000	90984000	82160000	79459000	93577000	76971000	-0.289692	0.818077	Down ↓
NP_999138	Heat shock protein HSP 90-alpha	HSP90; Hspca; HSP90AA1	3020100000	3173700000	3268200000	3187700000	2549600000	2722100000	2574200000	2497300000	-0.290421	0.817664	Down ↓
XP_003126410	cullin-associated NEDD8-dissociated protein 1	CAND1	233420000	240500000	245880000	253890000	194960000	202200000	196530000	202280000	-0.290748	0.817478	Down ↓
XP_003125080	sepiapterin reductase	SPR	115120000	106860000	118540000	115070000	101930000	89234000	97890000	83311000	-0.291019	0.817325	Down ↓
NP_001231864	transaldolase	TALDO1	555200000	564640000	591240000	582330000	467210000	469300000	464990000	470950000	-0.292567	0.816448	Down ↓
NP_001231403	peroxiredoxin-2	PRDX2	448220000	438050000	423080000	462670000	352480000	364440000	377730000	351800000	-0.292878	0.816272	Down ↓
NP_999584	Epithelial cell adhesion molecule	EGP; TACSTD1; EPCAM; Ep-CAM	327530000	313840000	308760000	295180000	258970000	270970000	249430000	236310000	-0.294059	0.815604	Down ↓
XP_005663204	microsomal glutathione S-transferase 3 isoform X1	MGST3	70029000	67609000	77871000	64735000	55394000	58735000	56134000	58227000	-0.294552	0.815325	Down ↓
XP_005665032	alpha-enolase isoform X2	-	9670600000	9668200000	9892900000	9332300000	8005100000	7881700000	7810800000	7738000000	-0.294855	0.815154	Down ↓
XP_005672866	NSFL1 (p97) cofactor (p47) isoform X3	-	374490000	409750000	439690000	381250000	336090000	315380000	364210000	292370000	-0.295317	0.814893	Down ↓
NP_999423	cAMP-dependent protein kinase type II-alpha regulatory subunit	PRKAR2A	236800000	245030000	229860000	213340000	173930000	188060000	190820000	200900000	-0.295491	0.814795	Down ↓
XP_003355368	tubulin--tyrosine ligase-like protein 12 isoform X2	TTLL12	437800000	436890000	444000000	445300000	350480000	368290000	370880000	346430000	-0.296706	0.814109	Down ↓
NP_001230732	nuclear migration protein nudC	NUDC	380050000	405210000	458180000	391830000	312560000	350240000	323240000	343450000	-0.298656	0.813009	Down ↓
NP_001231183	ras-related protein Rab-5C	RAB5C	238810000	243120000	243240000	235940000	188150000	190680000	210360000	191660000	-0.299656	0.812446	Down ↓
XP_005661538	basic transcription factor 3 isoform X3	-	227650000	238230000	234270000	233150000	185090000	188160000	188620000	196360000	-0.299705	0.812418	Down ↓
XP_003483582	PDZ and LIM domain protein 1	-	637570000	603880000	588990000	610490000	446640000	485970000	519330000	530470000	-0.300176	0.812154	Down ↓
XP_003360570	rab GDP dissociation inhibitor alpha	GDI1	94745000	88446000	110410000	91896000	73568000	79421000	85429000	74228000	-0.30219	0.811021	Down ↓
XP_005668982	integrin alpha-3-like	LOC102159369	281190000	261690000	275870000	273600000	208490000	214580000	237980000	223840000	-0.303865	0.810079	Down ↓
XP_005663934	Diacylglycerol kinase alpha	DGKA; DAGK	94599000	96563000	115440000	120260000	99202000	79587000	86832000	80107000	-0.304132	0.809929	Down ↓
XP_003127167	Eukaryotic translation initiation factor 3 subunit K	EIF3K	174640000	192600000	194650000	209270000	157780000	161500000	158630000	146490000	-0.30456	0.809689	Down ↓
NP_001011727	Adenosylhomocysteinase	AHCY	2433600000	2539200000	2670500000	2499000000	1920000000	2043800000	2185100000	2059900000	-0.305142	0.809363	Down ↓
XP_003123198	syntaxin-binding protein 2 isoform X3	STXBP2	24727000	21385000	25898000	23364000	19541000	19979000	16763000	20873000	-0.305818	0.808984	Down ↓
NP_999105	40S ribosomal protein S18	RPS18	803810000	732300000	745990000	615490000	659910000	597830000	527640000	558020000	-0.30625	0.808741	Down ↓
XP_005672094	glutaminase kidney isoform, mitochondrial	-	230080000	251070000	244910000	250800000	183010000	204320000	209690000	192170000	-0.307779	0.807884	Down ↓
NP_001231139	calmodulin	CALM1	2339500000	2347300000	2326800000	2367600000	1718300000	1920100000	2055500000	1883900000	-0.307993	0.807764	Down ↓
NP_001038003.1	Guanine nucleotide-binding protein subunit alpha-11	GNA11	58089000	61082000	66204000	60238000	51491000	47422000	50129000	49115000	-0.309743	0.806785	Down ↓
NP_001231327	pyruvate dehydrogenase E1 component subunit beta, mitochondrial	PDHB	250870000	280730000	274640000	249770000	171170000	220650000	237920000	219510000	-0.314362	0.804206	Down ↓
XP_005658731	adenylate kinase 2, mitochondrial-like isoform X3	-	312640000	310040000	333050000	332600000	268740000	251310000	256170000	259250000	-0.315216	0.80373	Down ↓
NP_001182307	valine--tRNA ligase	VARS	334200000	326890000	360430000	366350000	300550000	283340000	266990000	263940000	-0.316062	0.80326	Down ↓
NP_001231019	protein SET	SET	349070000	360500000	386870000	358260000	278850000	305840000	297300000	285390000	-0.317447	0.802488	Down ↓
NP_001124208	bifunctional purine biosynthesis protein PURH	purH; ATIC	322260000	347600000	332770000	336360000	267490000	278810000	285820000	241730000	-0.318353	0.801985	Down ↓
NP_001231762	alcohol dehydrogenase class-3	ADH5	61966000	70372000	75739000	70351000	55416000	54668000	55333000	57680000	-0.319633	0.801274	Down ↓
XP_001927356	transcription elongation factor B polypeptide 1	TCEB1	70991000	70281000	76194000	77142000	52344000	61257000	63838000	58315000	-0.321514	0.800229	Down ↓
XP_005659202	A-kinase anchor protein 12 isoform X5	-	83920000	80908000	75505000	75917000	64418000	73058000	50143000	65415000	-0.321734	0.800108	Down ↓
XP_003121807	acidic leucine-rich nuclear phosphoprotein 32 family member A	ANP32A	244380000	290040000	275700000	235910000	183470000	214190000	224070000	215050000	-0.322004	0.799958	Down ↓
XP_005662799	ATP-dependent RNA helicase DDX1	-	155570000	180300000	172290000	181130000	132800000	140760000	138780000	138950000	-0.3223	0.799794	Down ↓
NP_998931	Heat shock 70 kDa protein 1B	HSPA1B; HSP70.2; HSPA1A	1809800000	1875400000	1881500000	1818100000	1417700000	1501200000	1520400000	1450900000	-0.326242	0.797611	Down ↓
NP_001011507	lysosome-associated membrane glycoprotein 1 precursor	LAMP1; LAMP-1	96773000	95181000	103670000	100940000	86293000	72466000	83019000	73502000	-0.33092	0.795029	Down ↓
XP_003483583	phosphoglycerate mutase 1	PGAM1	2693000000	2796300000	3088700000	2722500000	1964300000	2311400000	2432600000	2273300000	-0.331342	0.794797	Down ↓
XP_003354007	calponin-2	CNN2; Calponin-2	566520000	545380000	518610000	529410000	424590000	452070000	421280000	418750000	-0.331348	0.794793	Down ↓
XP_005659619	retinal dehydrogenase 2 isoform X2	-	81195000	93033000	103510000	104670000	68888000	68589000	91659000	74583000	-0.332376	0.794228	Down ↓
NP_001004050	Prolyl endopeptidase	PREP	89715000	89033000	84246000	69707000	77645000	65701000	57143000	63549000	-0.333481	0.793619	Down ↓
XP_003123779	tubulin-specific chaperone A	TBCA	45122000	46815000	54807000	45976000	43918000	35819000	37104000	35893000	-0.335485	0.792518	Down ↓
NP_001192334	ras GTPase-activating protein-binding protein 1	G3BP1	242320000	253980000	237990000	205960000	169590000	192450000	188750000	187960000	-0.347958	0.785695	Down ↓
XP_005666606	uncharacterized protein LOC100739772	-	82548000	70250000	89687000	76139000	76470000	60984000	53321000	59268000	-0.349679	0.784759	Down ↓
XP_005663949	prostaglandin E synthase 3 isoform X2	PTGES3	536420000	576000000	602600000	570670000	429740000	487210000	431070000	444630000	-0.350536	0.784293	Down ↓
NP_001157492	Serine/threonine-protein phosphatase 2A 55 kDa regulatory subunit B	PPP2R2A	178870000	195210000	187440000	218550000	152470000	152590000	147990000	158150000	-0.351959	0.783519	Down ↓
XP_005654025	insulin-like growth factor 2 mRNA-binding protein 1	IGF2BP1	413460000	423400000	449970000	432320000	329340000	354570000	319990000	342520000	-0.352567	0.783189	Down ↓
NP_001137175	copine-1	CPNE1	53029000	56176000	53846000	57334000	49112000	45083000	40207000	37778000	-0.356108	0.781269	Down ↓
NP_001193333	tight junction protein ZO-2	TJP2; ZO-2	281830000	280990000	294820000	282700000	219190000	239700000	218410000	212490000	-0.357927	0.780285	Down ↓
NP_001106151	Transketolase	TKT	2097000000	2178800000	2288200000	2154200000	1695800000	1717200000	1702200000	1685800000	-0.358283	0.780092	Down ↓
XP_001928199	nuclear pore complex protein Nup133	NUP133	22932000	26671000	24812000	24772000	20082000	18710000	15952000	22613000	-0.358619	0.779911	Down ↓
XP_003128181	40S ribosomal protein S5	RPS5	469330000	429490000	487510000	512680000	440460000	315320000	388470000	332660000	-0.362666	0.777726	Down ↓
NP_001090945	Proteasome subunit beta type-7	PSMB7	78536000	94689000	100970000	87131000	79127000	66817000	69242000	65646000	-0.363594	0.777226	Down ↓
XP_005663951	nascent polypeptide-associated complex subunit alpha isoform X3	LOC100154750; NACA	526460000	585320000	506690000	491670000	368640000	437160000	432120000	394850000	-0.370017	0.773773	Down ↓
XP_001925077	acidic leucine-rich nuclear phosphoprotein 32 family member E, partial	-	71433000	74629000	72918000	66365000	56316000	58508000	54906000	50870000	-0.371274	0.773099	Down ↓
XP_003124794	transcription elongation factor B polypeptide 2 isoform 1	-	94056000	107490000	106330000	91102000	75173000	77044000	70631000	85191000	-0.373196	0.77207	Down ↓
NP_001007518	Cytochrome c oxidase subunit 5B, mitochondrial	COX5B	144730000	151130000	169360000	148570000	113510000	118160000	122470000	119520000	-0.373893	0.771697	Down ↓
XP_005669623	toll-like receptor 9 isoform X4	-	65952000	65655000	55152000	70064000	50453000	47687000	55609000	43359000	-0.381788	0.767486	Down ↓
XP_005673552	spermine synthase	SMS	44627000	42738000	51708000	50913000	37067000	36048000	36149000	36456000	-0.382694	0.767004	Down ↓
XP_005671032	translin-associated protein X isoform X1	TSNAX	39448000	36588000	31429000	33451000	27828000	28552000	23880000	27806000	-0.382923	0.766882	Down ↓
NP_001243707	myotrophin	MTPN	121630000	114620000	139520000	147560000	92148000	95671000	113780000	99512000	-0.383719	0.766459	Down ↓
NP_001136304	methionine adenosyltransferase 2 subunit beta	MAT2B; MAT2beta	34975000	34676000	38064000	35858000	31470000	30011000	23848000	24679000	-0.384176	0.766216	Down ↓
NP_001001539	Aldose reductase	ALR2; AR; AKR1B1	277730000	288670000	325020000	302010000	203350000	226070000	242560000	240890000	-0.386633	0.764913	Down ↓
XP_003134939	2-oxoglutarate dehydrogenase, mitochondrial	OGDH	348380000	357950000	376590000	359820000	279100000	272330000	280550000	268480000	-0.390705	0.762757	Down ↓
XP_003355965	flavin reductase (NADPH)	BLVRB	244910000	245420000	272590000	262070000	197130000	200300000	180130000	203730000	-0.39168	0.762242	Down ↓
XP_005660031	Galectin-3	LGALS3	2562700000	2677500000	2690000000	2690100000	1961100000	2041600000	2042900000	2049200000	-0.391757	0.762201	Down ↓
XP_005667427	Transgelin	SM22A; TAGLN	3073700000	3106000000	3192300000	3006800000	2223100000	2442000000	2428000000	2340700000	-0.391961	0.762093	Down ↓
XP_005653748	StAR-related lipid transfer (START) domain containing 10 isoform X5	-	81441000	79605000	86318000	78126000	62142000	59763000	59620000	66471000	-0.392296	0.761916	Down ↓
NP_001093401	Fatty acid-binding protein, heart	FABP3; H-FABP	945320000	962000000	1073200000	1014000000	756150000	780970000	762060000	738390000	-0.395104	0.760434	Down ↓
XP_005669387	programmed cell death 6-interacting protein	-	128050000	135080000	107430000	135400000	101310000	87068000	100570000	95777000	-0.395196	0.760386	Down ↓
NP_001230998	60S ribosomal protein L13a isoform 2	RPL13A; FLT3LG	90414000	88992000	86695000	101910000	64881000	82960000	67414000	64540000	-0.395379	0.76029	Down ↓
NP_001025706	BH3-interacting domain death agonist	BID	134660000	138300000	133310000	131170000	97202000	101230000	110510000	98296000	-0.400232	0.757737	Down ↓
XP_005656306	isocitrate dehydrogenase [NAD] subunit alpha, mitochondrial isoform X4	-	132940000	133270000	155490000	138720000	87543000	105080000	123300000	108560000	-0.400802	0.757437	Down ↓
NP_001116644	Alpha-1,4 glucan phosphorylase, glycogen phosphorylase liver form	PYGL	153050000	139980000	142780000	164930000	110950000	115760000	115070000	112740000	-0.402397	0.7566	Down ↓
XP_005655313	protein phosphatase 1G isoform X2	PPM1G	107840000	113000000	107820000	104750000	82237000	85441000	81158000	78610000	-0.404475	0.755511	Down ↓
XP_003133218	nucleolar and coiled-body phosphoprotein 1 isoform X1	-	115670000	98986000	136920000	106920000	89859000	95197000	79625000	81200000	-0.406633	0.754382	Down ↓
NP_999573	Peroxiredoxin-6	PRDX6; PHGPX; AOP2	1260200000	1337000000	1362700000	1295400000	985730000	994590000	1019400000	949770000	-0.412107	0.751525	Down ↓
XP_003122620	multifunctional methyltransferase subunit TRM112-like protein	TRMT112	49661000	61049000	60408000	49880000	38154000	41130000	44040000	42744000	-0.412259	0.751446	Down ↓
NP_001231345	Profilin-1	PFN1	2245100000	2386800000	2363100000	2500500000	1811500000	1790400000	1850400000	1663300000	-0.416259	0.749365	Down ↓
NP_001231390	glia maturation factor beta	GMFB	79793000	92863000	83612000	89834000	71102000	59240000	55256000	73378000	-0.418379	0.748265	Down ↓
XP_003129931	platelet-activating factor acetylhydrolase IB subunit beta	-	93331000	99842000	106940000	100940000	75658000	74730000	72613000	76778000	-0.419894	0.74748	Down ↓
XP_005659465	phosphoacetylglucosamine mutase isoform X3	-	395280000	389820000	414950000	378110000	278840000	296970000	306660000	296130000	-0.421169	0.746819	Down ↓
NP_001231909	prefoldin subunit 3	VBP1	50573000	52516000	51052000	65505000	37478000	39821000	44629000	41896000	-0.423034	0.745855	Down ↓
XP_005662202	ubiquitin carboxyl-terminal hydrolase 7 isoform X5	-	33742000	27954000	34618000	36565000	29951000	26659000	20881000	21607000	-0.423185	0.745776	Down ↓
XP_005674605	la-related protein 1	LARP1	38399000	44226000	49881000	50663000	38985000	27466000	33690000	36451000	-0.423302	0.745716	Down ↓
NP_001038071	ATP synthase subunit O, mitochondrial	ATP5O; OSCP	551460000	547610000	556180000	540050000	379510000	425100000	424670000	407470000	-0.423584	0.74557	Down ↓
NP_999495	Glucose-6-phosphate isomerase	GPI; PGI	1948400000	1910900000	1951800000	1985600000	1447000000	1443200000	1483800000	1438300000	-0.423754	0.745482	Down ↓
NP_999092	Aspartate aminotransferase, cytoplasmic	cCAT; GOT1; CASPAT	281230000	259600000	292100000	279290000	207100000	220690000	197750000	202630000	-0.425443	0.74461	Down ↓
XP_005656357	cofilin-2 isoform X2	-	202810000	222880000	220290000	230480000	152740000	182080000	166200000	148640000	-0.432003	0.741232	Down ↓
NP_001231279	carboxymethylenebutenolidase homolog	CMBL	9675100	8880400	10489000	9603500	8033900	7068700	7452500	6069800	-0.433123	0.740657	Down ↓
NP_999133	Integrin beta; Integrin beta-1	ITGB1; CD29	949170000	961560000	1007500000	954080000	686510000	713150000	756440000	711770000	-0.433215	0.74061	Down ↓
XP_005655276	macrophage-capping protein isoform X9	-	217860000	226160000	256860000	246380000	153310000	189600000	199400000	158300000	-0.435149	0.739617	Down ↓
XP_005658844	nuclear autoantigenic sperm protein isoform X2	-	88589000	99807000	76097000	78832000	56520000	69547000	60063000	67409000	-0.437367	0.738481	Down ↓
XP_005663882	eukaryotic translation initiation factor 3, subunit D isoform X1	-	221260000	197530000	223540000	219520000	154990000	165610000	162050000	153400000	-0.438297	0.738005	Down ↓
NP_001090896	MHC class I antigen 3 precursor	SLA-7; SLA-3; SLA-1	79982000	81065000	83331000	82079000	57070000	64404000	61287000	58120000	-0.438572	0.737864	Down ↓
XP_001925468	GTP-binding nuclear protein Ran isoform X1	RAN	1438300000	1556200000	1615600000	1440300000	1063000000	1132400000	1177400000	1082100000	-0.441637	0.736298	Down ↓
XP_003123541	procollagen galactosyltransferase 1	COLGALT1; GLT25D1	58551000	56392000	67432000	54672000	42183000	44587000	47644000	39871000	-0.443725	0.735234	Down ↓
XP_003121745	plasminogen activator inhibitor 2	-	389060000	377510000	395120000	378050000	278530000	286440000	285540000	279180000	-0.44676	0.733689	Down ↓
XP_003128015	tumor-associated calcium signal transducer 2	TACSTD2	504530000	517290000	530100000	544730000	387700000	399500000	379150000	369090000	-0.449434	0.73233	Down ↓
XP_005671504	xaa-Pro aminopeptidase 1 isoform X4	XPNPEP1	103740000	105470000	108430000	113600000	76202000	82609000	74194000	82635000	-0.450211	0.731936	Down ↓
XP_005670770	malectin isoform X2	-	53511000	63017000	76713000	61498000	51179000	48350000	42833000	44086000	-0.450247	0.731918	Down ↓
XP_005657854	RNA-binding protein 3 isoform X2	RBM3	299180000	305790000	305910000	293070000	223380000	224010000	218420000	213880000	-0.452708	0.73067	Down ↓
XP_005655190	SUMO-conjugating enzyme UBC9 isoform X1	UBE2I; UBC9	66376000	65273000	72536000	79544000	45504000	64346000	42698000	54407000	-0.455197	0.729411	Down ↓
XP_001928821	nicastrin isoform X2	NCSTN	49686000	48463000	45835000	60501000	30341000	37686000	45954000	35010000	-0.45677	0.728616	Down ↓
XP_005673337	glycine--tRNA ligase isoform X2	-	280080000	290880000	351690000	297310000	222910000	212190000	243500000	209150000	-0.458608	0.727688	Down ↓
NP_998955	m7GpppX diphosphatase	DCPS; HINT-5	97209000	87364000	88918000	84789000	74985000	61377000	65502000	57714000	-0.464919	0.724512	Down ↓
NP_999319	thioredoxin reductase 1, cytoplasmic	TXNRD1; TRXR1	96023000	97219000	90643000	95601000	62531000	71563000	69724000	71069000	-0.465208	0.724367	Down ↓
XP_003481998	spermidine synthase isoform X2	SRM	98384000	106200000	102060000	112150000	78138000	83836000	71713000	68924000	-0.468776	0.722577	Down ↓
XP_001924663	serpin B5	SERPINB5	177480000	169710000	180180000	192840000	125830000	138390000	128640000	127250000	-0.469601	0.722164	Down ↓
NP_001230489	39S ribosomal protein L40, mitochondrial	MRPL40	16439000	21455000	16860000	21026000	13390000	13502000	13193000	14491000	-0.47355	0.72019	Down ↓
NP_001116685	Vesicle-associated membrane protein-associated protein B	VAPB	148290000	174630000	159650000	145610000	121430000	104290000	116790000	108650000	-0.477539	0.718202	Down ↓
XP_005655601	peptidyl-prolyl cis-trans isomerase FKBP11-like	LOC100512782	45161000	45400000	33538000	35710000	31362000	31731000	27927000	23658000	-0.47876	0.717594	Down ↓
XP_003125231	leucine-rich PPR motif-containing protein, mitochondrial	LRPPRC	1056600000	1053500000	1132800000	1112500000	749570000	808270000	800970000	761180000	-0.481264	0.71635	Down ↓
XP_005656258	CTP synthase 1 isoform X4	-	283240000	277590000	270000000	292420000	208140000	201040000	200360000	192340000	-0.486221	0.713893	Down ↓
XP_005671766	long-chain-fatty-acid--CoA ligase 1 isoform X1	ACSL1; FACL2	57319000	61948000	59555000	69242000	46771000	43967000	50570000	35422000	-0.489165	0.712437	Down ↓
NP_001230874	heat shock protein 75 kDa, mitochondrial	TRAP1	224390000	234500000	241030000	208850000	156920000	161150000	181070000	143950000	-0.498895	0.707649	Down ↓
NP_001231460	thioredoxin-dependent peroxide reductase, mitochondrial	PRDX3	375730000	387340000	429480000	402970000	269970000	296240000	280610000	279910000	-0.501885	0.706184	Down ↓
XP_005666719	peptidyl-prolyl cis-trans isomerase D isoform X1	-	47959000	43318000	50215000	46883000	41667000	27995000	30224000	33137000	-0.501932	0.706161	Down ↓
XP_005665338	NADH dehydrogenase [ubiquinone] flavoprotein 2, mitochondrial isoform X1	NDUFV2; NUDFV2	46999000	38098000	42416000	51214000	28450000	35421000	35064000	27234000	-0.5024	0.705931	Down ↓
XP_005656212	Adenylate kinase 4, mitochondrial	AK4; AK3L1; AK3	115780000	131010000	151530000	115360000	105010000	78352000	97628000	81283000	-0.503793	0.70525	Down ↓
XP_005663205	4-trimethylaminobutyraldehyde dehydrogenase	ALDH9A1	92151000	81631000	93924000	90875000	67825000	71887000	59553000	53523000	-0.504371	0.704968	Down ↓
XP_005655354	60S ribosomal protein L8	RPL8	297960000	272900000	280960000	251730000	182320000	207250000	187570000	198400000	-0.508879	0.702768	Down ↓
XP_005668937	integrin alpha-3 isoform X2	LOC100517053; ITGA3	373140000	390040000	384360000	373130000	272520000	257720000	265710000	269090000	-0.513799	0.700375	Down ↓
XP_005653162	NADH dehydrogenase [ubiquinone] 1 alpha subcomplex, subunit 6-like	LOC100156627	40965000	32397000	34351000	43464000	25933000	28120000	27147000	24417000	-0.517397	0.698631	Down ↓
XP_003135174	3-hydroxyacyl-CoA dehydrogenase type-2 isoform X2	HSD17B10	229410000	220570000	247930000	226310000	163290000	157920000	162880000	160380000	-0.520123	0.697312	Down ↓
XP_005657843	ubiquitin-like modifier activating, enzyme 1	-	886240000	942320000	954690000	901590000	650150000	660080000	625440000	620250000	-0.527759	0.693631	Down ↓
XP_003126608	NADH dehydrogenase [ubiquinone] 1 alpha subcomplex, subunit 9, mitochondrial	NDUFA9	97856000	111940000	111040000	103050000	76506000	70435000	71390000	74735000	-0.532451	0.691379	Down ↓
XP_003129926	oligoribonuclease, mitochondrial	REXO2	22546000	19404000	22739000	22035000	15250000	14431000	14473000	15750000	-0.533779	0.690743	Down ↓
XP_003353419	deoxyuridine 5'-triphosphate nucleotidohydrolase, mitochondrial isoform X2	DUT	141890000	152140000	151480000	138750000	95670000	112280000	97496000	96577000	-0.539332	0.688089	Down ↓
XP_003359671	NADH-ubiquinone oxidoreductase 75 kDa subunit, mitochondrial isoform X2	-	249960000	247390000	257020000	262230000	164910000	185670000	176350000	170510000	-0.543611	0.686052	Down ↓
XP_003356757	NEDD8 isoform X2	-	160640000	187030000	159620000	177440000	105850000	122100000	121610000	118540000	-0.548718	0.683627	Down ↓
XP_001928912	alpha-centractin	ACTR1A	208920000	217090000	225010000	198750000	154060000	154480000	135930000	135590000	-0.55087	0.682608	Down ↓
XP_005663271	transgelin-2 isoform X5	-	2841100000	2876200000	3394700000	3213000000	2061100000	2158600000	2093800000	2094000000	-0.551839	0.68215	Down ↓
NP_001230453	elongation factor 1-beta	EEF1B2	1519200000	1603700000	1625200000	1577800000	1028300000	1130200000	1133400000	1022500000	-0.552111	0.682022	Down ↓
XP_003483310	GMP synthase [glutamine-hydrolyzing]-like	-	233640000	254680000	254390000	242560000	163750000	180390000	159590000	163070000	-0.563265	0.676769	Down ↓
NP_999170.1	Osteoclast-stimulating factor 1	OSTF1	183510000	189040000	177070000	212760000	121620000	131670000	128820000	133530000	-0.564146	0.676356	Down ↓
XP_003356255	chloride intracellular channel protein 4	CLIC4	199790000	227540000	225970000	234600000	162460000	146730000	141790000	147630000	-0.568781	0.674186	Down ↓
NP_001171999	ran-specific GTPase-activating protein	RANBP1	521780000	506820000	544500000	516130000	372570000	352170000	351510000	327040000	-0.574158	0.671678	Down ↓
XP_003128059	UMP-CMP kinase	CMPK1	153210000	152580000	146980000	142550000	98514000	108480000	99705000	92389000	-0.576958	0.670376	Down ↓
NP_001090881	porphobilinogen deaminase	HMBS	51027000	63155000	60290000	53662000	40609000	35350000	38782000	37035000	-0.587938	0.665293	Down ↓
XP_005659121	mitochondrial-processing peptidase subunit alpha	-	30752000	32377000	34689000	36344000	21651000	24400000	22484000	20436000	-0.592569	0.663161	Down ↓
XP_003125985	N(G),N(G)-dimethylarginine dimethylaminohydrolase 1	-	36066000	27906000	39707000	28417000	21094000	21604000	22407000	22425000	-0.593737	0.662624	Down ↓
XP_005667788	pseudouridylate synthase 7 homolog	-	33527000	34003000	32004000	36388000	28809000	16744000	24630000	18922000	-0.609201	0.65556	Down ↓
XP_003360587	cellular nucleic acid-binding protein, partial	-	43669000	50674000	56433000	41390000	29689000	28877000	34940000	32446000	-0.609479	0.655433	Down ↓
XP_005668668.1	5'(3')-deoxyribonucleotidase, cytosolic type isoform X2	-	32285000	37865000	33915000	33208000	25413000	20341000	24162000	19555000	-0.617556	0.651774	Down ↓
XP_005660644.1	nucleosome assembly protein 1-like 4	-	286280000	324580000	297920000	300420000	193040000	192070000	211400000	188530000	-0.623215	0.649223	Down ↓
XP_003122508	coronin-1B	-	89460000	86372000	109250000	111940000	59957000	71634000	63314000	62545000	-0.624927	0.648453	Down ↓
XP_005673463.1	Thymosin beta-4	TMSB4X; TMSB4	96219000	86830000	115420000	102220000	56301000	65435000	70824000	64273000	-0.641652	0.640978	Down ↓
XP_005661932.1	28 kDa heat- and acid-stable phosphoprotein	PDAP1	41216000	35511000	38835000	40499000	24731000	27938000	21560000	25593000	-0.64468	0.639635	Down ↓
XP_005661988.1	serrate RNA effector molecule homolog isoform X7	SRRT	50238000	53352000	52956000	57401000	38881000	30420000	30859000	36668000	-0.64489	0.639542	Down ↓
NP_999518.1	Peptidyl-prolyl cis-trans isomerase; Peptidyl-prolyl cis-trans isomerase A	CYPA; PPIA	6940300000	6966800000	7018700000	6909200000	4353800000	4497400000	4712900000	4089700000	-0.656921	0.63423	Down ↓
XP_005664792.1	aldehyde dehydrogenase family 16 member A1 isoform X5	ALDH16A1	33991000	36024000	34205000	39613000	22542000	16584000	28949000	22851000	-0.66163	0.632164	Down ↓
XP_003127286.2	neutral amino acid transporter B(0) isoform 2	-	48639000	67494000	48836000	66216000	38373000	35274000	36447000	35174000	-0.670331	0.628363	Down ↓
NP_001230725.1	NADH dehydrogenase [ubiquinone] iron-sulfur protein 3, mitochondrial	NDUFS3	44913000	48999000	53552000	60740000	30538000	36466000	31494000	32171000	-0.672081	0.627601	Down ↓
XP_005670115.1	insulin-like growth factor 2 mRNA-binding protein 2 isoform X2	RFC4; IGF2BP2	127220000	151700000	149280000	138220000	91295000	76022000	101930000	80685000	-0.694798	0.617796	Down ↓
NP_999280.1	Protein phosphatase 1 regulatory subunit 14B	pPHI-1; PHI-1; PPP1R14B	36911000	45242000	45152000	52735000	24908000	27524000	28956000	28528000	-0.711916	0.610509	Down ↓
NP_001302501.1	interferon-induced protein with tetratricopeptide repeats 5	IFIT5; LOC100151816	19362000	20813000	21646000	19919000	13191000	11749000	12159000	12617000	-0.717332	0.608221	Down ↓
XP_005674102.1	glucose-6-phosphate 1-dehydrogenase X-like isoform X2	-	71600000	62522000	65307000	70555000	40554000	42532000	42412000	38597000	-0.718343	0.607795	Down ↓
XP_005670466.1	cell cycle and apoptosis regulator protein 2 isoform X2	CCAR2; KIAA1967	150940000	153310000	176590000	158510000	109580000	89113000	101070000	82010000	-0.743891	0.597127	Down ↓
XP_005656148.1	adenylyl cyclase-associated protein 1-like isoform X1	LOC100517346	441840000	451270000	457670000	431750000	331220000	244450000	222340000	260830000	-0.751442	0.59401	Down ↓
XP_005671393.1	delta-1-pyrroline-5-carboxylate synthase isoform X2	ALDH18A1	191180000	172930000	192770000	177590000	106530000	113690000	106850000	106300000	-0.761104	0.590045	Down ↓
XP_005654080.1	ras-related protein Rab-7a-like	-	182840000	191110000	226890000	177050000	127360000	126720000	74023000	129770000	-0.764619	0.588609	Down ↓
XP_003355772.1	adenine phosphoribosyltransferase	APRT	46896000	54442000	75909000	53653000	33325000	33230000	33317000	34845000	-0.777336	0.583443	Down ↓
XP_005667349.1	L-aminoadipate-semialdehyde dehydrogenase-phosphopantetheinyl transferase isoform X2	AASDHPPT	26263000	39705000	38859000	28601000	18797000	19277000	20062000	18697000	-0.796263	0.575839	Down ↓
NP_001090951.1	Thymosin beta-10	TMSB10	204130000	234120000	280110000	224580000	104390000	146800000	136500000	105770000	-0.934233	0.523321	Down ↓
XP_001927775.1	protein CYR61	CYR61	78444000	84356000	52651000	81670000	39831000	26767000	33273000	40337000	-1.08348	0.471889	Down ↓
XP_005669484.1	HIG1 domain family member 1A, mitochondrial	HIGD1A	22963000	33321000	34496000	20543000	14393000	14375000	0	17753000	-1.2588	0.417892	Down ↓
NP_001231616.1	60S ribosomal protein L36	RPL36	94208000	122990000	119220000	103190000	44091000	46819000	48573000	43365000	-1.26557	0.415934	Down ↓
XP_005652750.1	serpin B8 isoform X2	-	59112000	45309000	58091000	51579000	25748000	17409000	18906000	19973000	-1.3839	0.383183	Down ↓
XP_003358691.1	elongation factor G, mitochondrial isoform X1	GFM1	57673000	71793000	64889000	65203000	0	33142000	31661000	30941000	-1.4388	0.368873	Down ↓
XP_005658086.1	phosphoglucomutase-2-like	-	11775000	11403000	11944000	13262000	0	7516000	9328900	0	-1.52222	0.34815	Down ↓
XP_003134773.1	neural Wiskott-Aldrich syndrome protein	WASL	15086000	17154000	22627000	15051000	0	12615000	0	11601000	-1.5297	0.346349	Down ↓
XP_003481357.1	Low molecular weight phosphotyrosine protein phosphatase	LMW-PTP; LMW-PTPase; LOC100737301; ACP1	95599000	89673000	107200000	96461000	50531000	61440000	0	18672000	-1.57389	0.335901	Down ↓
XP_003122675	Flap endonuclease 1	FEN1	39336000	36146000	50136000	61226000	33310000	29299000	0	0	-1.57739	0.335087	Down ↓
XP_005660841.1	heterogeneous nuclear ribonucleoprotein U-like protein 2 isoform X2	HNRNPUL2	97822000	92061000	79239000	110230000	56928000	0	0	62912000	-1.66243	0.315907	Down ↓
NP_999491.1	60S ribosomal protein L35	RPL35	238100000	239610000	263420000	226300000	69991000	76382000	72957000	64315000	-1.77007	0.293194	Down ↓
XP_005673095.1	mRNA export factor	MRNP41; RAE1	76856000	74306000	69282000	73838000	0	0	0	69103000	-2.09038	0.234819	Down ↓
XP_003358231.1	stromal cell-derived factor 2	SDF2	19188000	25232000	22455000	21239000	17514000	0	0	0	-2.33086	0.198765	Down ↓
NP_999410.1	Secretory carrier-associated membrane protein 1	SCAMP1	36247000	39673000	38657000	40084000	29314000	0	0	0	-2.39945	0.189537	Down ↓
XP_005657190.1	ubiquitin carboxyl-terminal hydrolase 25 isoform X3	-	14624000	7391800	7783200	8210500	0	0	7019200	0	-2.43698	0.18467	Down ↓
XP_003125099.3	protein FAM136A	FAM136A	75641000	49313000	84996000	43289000	0	25683000	0	17321000	-2.55796	0.169816	Down ↓
XP_005662233.1	Coronin	LOC100513346; CORO7	11470000	10961000	12297000	18547000	0	8941800	0	0	-2.57482	0.167842	Down ↓
XP_005671000.1	ubiquitin fusion degradation protein 1 homolog isoform X3	-	29891000	29023000	32655000	31676000	17185000	0	0	0	-2.84231	0.139438	Down ↓
XP_003481294.1	HEAT repeat-containing protein 5B	HEATR5B	88221000	87052000	152690000	131190000	0	0	0	44756000	-3.35882	0.0974751	Down ↓
XP_003361616.2	glyceraldehyde-3-phosphate dehydrogenase-like, partial	-	111360000	108460000	218270000	227850000	31728000	0	0	0	-4.39156	0.0476439	Down ↓
* The log2 fold-change have a range of (1, infinity/Inf) and (-infinity/-Inf, -1) indicating (up-regulation, activation) and (deactivation, down-regulation), respectively
